# Supplementary material for: Duplication and Retention Biases of Essential and Non-Essential Genes Revealed by Systematic Knockdown Analyses
Source: PLOS journal article supplement (doi:10.1371/journal.pgen.1003330), 2013-05-09

|                             |                                                                                                                                                                                                                                                                                                                                                                        |
|-----------------------------|------------------------------------------------------------------------------------------------------------------------------------------------------------------------------------------------------------------------------------------------------------------------------------------------------------------------------------------------------------------------|
| Title                       | Duplication and retention biases of essential and non-essential genes revealed by systematic knockdown analyses                                                                                                                                                                                                                                                        |
| Authors                     | Woods, Shane;Coghlan, Avril;Rivers, David;Warnecke, Tobias;Jeffries, Sean J.;Kwon, Taejoon;Rogers, Anthony;Hurst, Laurence D.;Ahringer, Julie                                                                                                                                                                                                                          |
| Publication date            | 2013                                                                                                                                                                                                                                                                                                                                                                   |
| Original Citation           | Woods S, Coghlan A, Rivers D, Warnecke T, Jeffries SJ, Kwon T, et al. (2013) Duplication and Retention Biases of Essential and Non-Essential Genes Revealed by Systematic Knockdown Analyses. PLoS Genet 9(5): e1003330. doi:10.1371/journal.pgen.1003330                                                                                                              |
| Type of publication         | Article (peer-reviewed)                                                                                                                                                                                                                                                                                                                                                |
| Link to publisher's version | 10.1371/journal.pgen.1003330                                                                                                                                                                                                                                                                                                                                           |
| Rights                      | © 2013 Woods et al. This is an open access article distributed under the terms of the Creative Commons Attribution License, which permits unrestricted use, distribution, and reproduction in any medium, provided the original author and source are credited - <a href="http://creativecommons.org/licenses/by/4.0/">http://creativecommons.org/licenses/by/4.0/</a> |
| Download date               | 2024-05-01 21:25:09                                                                                                                                                                                                                                                                                                                                                    |
| Item downloaded from        | <a href="https://hdl.handle.net/10468/2381">https://hdl.handle.net/10468/2381</a>                                                                                                                                                                                                                                                                                      |

Figure S4

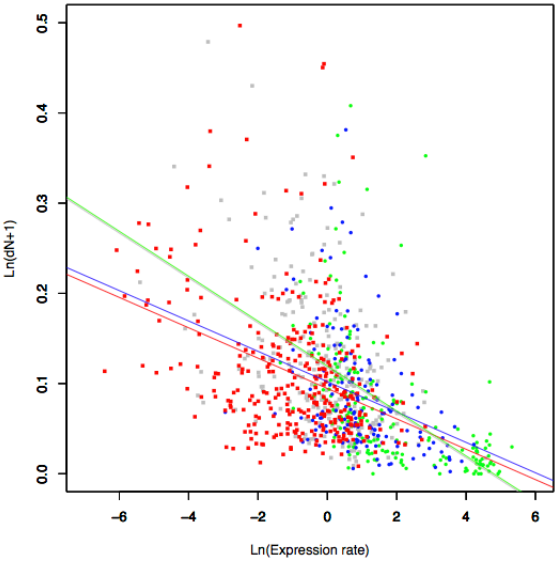

Supplement: S4 (10.1371/journal.pgen.1003330.s004) [file journal.pgen.1003330.s004.PDF]
