# Supplementary material for: Duplication and Retention Biases of Essential and Non-Essential Genes Revealed by Systematic Knockdown Analyses
Source: PubMed Central journal article supplement (PMC3649981; doi:10.1371/journal.pgen.1003330), 2013-05-09

Figure S4

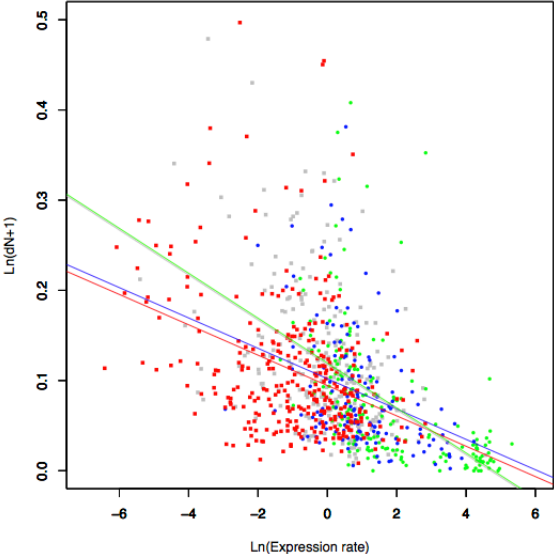

Supplement: pgen.1003330.s004.pdf [file pgen.1003330.s004.pdf]
