# Supplementary material for: Duplication and Retention Biases of Essential and Non-Essential Genes Revealed by Systematic Knockdown Analyses
Source: PLoS Genet. 2013 May 9;9(5):e1003330. doi: 10.1371/journal.pgen.1003330 (PMC3649981; doi:10.1371/journal.pgen.1003330)
Supplement: Table S1 — Distribution and enrichment of Gene Ontology (GO) functional terms among the 178 younger C. elegans duplicate gene pairs compared to (a) the genome, and (b) the set of all duplicate gene pairs tested for masking. (XLS) [file pgen.1003330.s007.xls]

## Sheet: Legend
Distribution and enrichment of Gene Ontology (GO) functional terms among the 178 younger C. elegans duplicate gene pairs compared to (a) the genome, and (b) the set of all duplicate gene pairs tested for masking (see Materials and Methods).
(a): a comparison of 354 genes belonging to the 178 younger C. elegans duplicate pairs compared to 20,517 genes in the whole genome; no significant differences (<0.01) were observed
(b): a comparison of 354 genes belonging to the 178 younger duplicated pairs compared to 1576 genes belonging to the 790 duplicate pairs tested for phenotype masking; only one term was slightly enriched in the younger
gene set (zinc ion binding), and cannot account for the differences in phenotype rate observed.
The well annotated C. elegans seven-transmembrane G-protein-coupled chemoreceptors are not adequately represented by the Gene Ontology term annotations.
We carried out an independent analysis using WormBase 'protein description' annotations, finding 981 protein coding genes in the C. elegans genome annotated as '7TM chemoreceptors'.
Removing these 981 chemoreceptors from our analysis does not alter the significance of our reported findings; the double knockdown phenotype rate of
young duplicates (21 of 381 pairs) remains significantly lower than the knockdown rate across the C. elegans genome (1908 of 13722; 5.5% vs. 13.9%; X2-test: P<10-5).
In table (a), GO terms are found for 69% of the genes in the test set (younger C. elegans duplicates) and 70% of genes in the population set (the whole genome).
In table (b), GO terms are found for 69% of the genes in the test set (younger C. elegans duplicates) and 83% of genes in the population set (all duplicates tested for masking).
Column A shows the unique GO identification
Column B shows the GO term name
Column C shows the P-value for enrichment for each GO term after correcting for multiple hypothesis testing using the Bonferroni correction
Column D shows the number of young duplicate genes assigned to each GO term
Column E shows the number of genes in the C. elegans genome (or set of all duplicates tested for masking, in table b) assigned to each GO term
Column F shows the percent of young duplicate genes assigned to each GO term
Column G shows the percent of genes in the C. elegans genome (or set of all duplicates tested for masking, in table b) assigned to each GO term
Column H shows the percent difference between young duplicates and genes of the C. elegans genome (or set of all duplicates tested for masking, in table b) for each GO term

## Sheet: GO term analysis (a)
Gene Ontology ID	Gene Ontology term	Corrected P-value	Number in young duplicate gene set	Number in genome	Percent in young duplicate gene set	Percent in genome	Percent difference
GO:0004872	receptor activity	0.0146069	23	611	9.38776	4.23746	5.15029
GO:0060089	molecular transducer activity	0.0147482	25	700	10.2041	4.85471	5.34938
GO:0004871	signal transducer activity	0.0339423	25	700	10.2041	4.85471	5.34938
GO:0001067	regulatory region nucleic acid binding	0.818217	17	551	6.93878	3.82135	3.11743
GO:0043167	ion binding	0.98272	34	1438	13.8776	9.97295	3.9046
GO:0008270	zinc ion binding	1	34	1001	13.8776	6.94223	6.93532
GO:0046914	transition metal ion binding	1	34	1199	13.8776	8.31542	5.56213
GO:0016627	oxidoreductase activity, acting on the CH-CH group of donors	1	4	72	1.63265	0.499341	1.13331
GO:0001071	nucleic acid binding transcription factor activity	1	17	549	6.93878	3.80748	3.1313
GO:0008276	protein methyltransferase activity	1	4	33	1.63265	0.228865	1.40379
GO:0003707	steroid hormone receptor activity	1	17	270	6.93878	1.87253	5.06625
GO:0008417	fucosyltransferase activity	1	4	29	1.63265	0.201124	1.43153
GO:0033765	steroid dehydrogenase activity, acting on the CH-CH group of donors	1	2	3	0.816327	0.0208059	0.795521
GO:0004671	protein C-terminal S-isoprenylcysteine carboxyl O-methyltransferase activity	1	2	2	0.816327	0.0138706	0.802456
GO:0000975	regulatory region DNA binding	1	17	551	6.93878	3.82135	3.11743
GO:0004176	ATP-dependent peptidase activity	1	2	10	0.816327	0.0693529	0.746974
GO:0016229	steroid dehydrogenase activity	1	2	17	0.816327	0.1179	0.698427
GO:0070403	NAD+ binding	1	2	4	0.816327	0.0277412	0.788585
GO:0005275	amine transmembrane transporter activity	1	2	19	0.816327	0.131771	0.684556
GO:0008757	S-adenosylmethionine-dependent methyltransferase activity	1	4	45	1.63265	0.312088	1.32056
GO:0004022	alcohol dehydrogenase (NAD) activity	1	2	10	0.816327	0.0693529	0.746974
GO:0008237	metallopeptidase activity	1	7	174	2.85714	1.20674	1.6504
GO:0015276	ligand-gated ion channel activity	1	4	125	1.63265	0.866912	0.765741
GO:0051287	NAD binding	1	2	29	0.816327	0.201124	0.615203
GO:0005342	organic acid transmembrane transporter activity	1	2	27	0.816327	0.187253	0.629074
GO:0043565	sequence-specific DNA binding	1	17	631	6.93878	4.37617	2.56261
GO:0004536	deoxyribonuclease activity	1	2	16	0.816327	0.110965	0.705362
GO:0008233	peptidase activity	1	11	463	4.4898	3.21104	1.27875
GO:0008171	O-methyltransferase activity	1	2	12	0.816327	0.0832235	0.733103
GO:0016888	endodeoxyribonuclease activity, producing 5'-phosphomonoesters	1	2	7	0.816327	0.0485471	0.767779
GO:0003880	protein C-terminal carboxyl O-methyltransferase activity	1	2	2	0.816327	0.0138706	0.802456
GO:0003677	DNA binding	1	19	907	7.7551	6.29031	1.46479
GO:0000976	transcription regulatory region sequence-specific DNA binding	1	17	550	6.93878	3.81441	3.12436
GO:0043621	protein self-association	1	1	9	0.408163	0.0624176	0.345746
GO:0030246	carbohydrate binding	1	4	117	1.63265	0.811429	0.821224
GO:0046983	protein dimerization activity	1	2	50	0.816327	0.346765	0.469562
GO:0016741	transferase activity, transferring one-carbon groups	1	4	123	1.63265	0.853041	0.779612
GO:0004520	endodeoxyribonuclease activity	1	2	14	0.816327	0.0970941	0.719232
GO:0022857	transmembrane transporter activity	1	7	681	2.85714	4.72294	-1.86579
GO:0060589	nucleoside-triphosphatase regulator activity	1	2	97	0.816327	0.672723	0.143603
GO:0004568	chitinase activity	1	2	38	0.816327	0.263541	0.552785
GO:0016757	transferase activity, transferring glycosyl groups	1	6	234	2.44898	1.62286	0.826121
GO:0016782	transferase activity, transferring sulfur-containing groups	1	2	42	0.816327	0.291282	0.525044
GO:0016614	oxidoreductase activity, acting on CH-OH group of donors	1	2	69	0.816327	0.478535	0.337791
GO:0003700	sequence-specific DNA binding transcription factor activity	1	17	549	6.93878	3.80748	3.1313
GO:0051998	protein carboxyl O-methyltransferase activity	1	2	6	0.816327	0.0416118	0.774715
GO:0016301	kinase activity	1	8	549	3.26531	3.80748	-0.54217
GO:0022834	ligand-gated channel activity	1	4	125	1.63265	0.866912	0.765741
GO:0005179	hormone activity	1	2	34	0.816327	0.2358	0.580527
GO:0022836	gated channel activity	1	4	200	1.63265	1.38706	0.245594
GO:0008170	N-methyltransferase activity	1	2	24	0.816327	0.166447	0.649879
GO:0031177	phosphopantetheine binding	1	1	17	0.408163	0.1179	0.290263
GO:0016773	phosphotransferase activity, alcohol group as acceptor	1	8	545	3.26531	3.77974	-0.514429
GO:0032559	adenyl ribonucleotide binding	1	8	904	3.26531	6.26951	-3.0042
GO:0030554	adenyl nucleotide binding	1	8	905	3.26531	6.27644	-3.01113
GO:0022892	substrate-specific transporter activity	1	7	615	2.85714	4.26521	-1.40806
GO:0016810	hydrolase activity, acting on carbon-nitrogen (but not peptide) bonds	1	2	57	0.816327	0.395312	0.421015
GO:0004672	protein kinase activity	1	8	477	3.26531	3.30814	-0.042829
GO:0050662	coenzyme binding	1	4	136	1.63265	0.9432	0.689453
GO:0030695	GTPase regulator activity	1	2	95	0.816327	0.658853	0.157474
GO:0046933	hydrogen ion transporting ATP synthase activity, rotational mechanism	1	1	14	0.408163	0.0970941	0.311069
GO:0016740	transferase activity	1	20	1308	8.16327	9.07136	-0.908099
GO:0015171	amino acid transmembrane transporter activity	1	2	15	0.816327	0.104029	0.712297
GO:0010340	carboxyl-O-methyltransferase activity	1	2	6	0.816327	0.0416118	0.774715
GO:0022891	substrate-specific transmembrane transporter activity	1	7	583	2.85714	4.04328	-1.18613
GO:0005102	receptor binding	1	2	86	0.816327	0.596435	0.219891
GO:0038023	signaling receptor activity	1	23	603	9.38776	4.18198	5.20577
GO:0016893	endonuclease activity, active with either ribo- or deoxyribonucleic acids and producing 5'-phosphomonoesters	1	2	20	0.816327	0.138706	0.677621
GO:0005524	ATP binding	1	8	903	3.26531	6.26257	-2.99726
GO:0004519	endonuclease activity	1	2	39	0.816327	0.270476	0.54585
GO:0015078	hydrogen ion transmembrane transporter activity	1	1	66	0.408163	0.457729	-0.0495661
GO:0016787	hydrolase activity	1	25	1727	10.2041	11.9773	-1.77317
GO:0005216	ion channel activity	1	4	300	1.63265	2.08059	-0.447935
GO:0004518	nuclease activity	1	2	76	0.816327	0.527082	0.289244
GO:0003676	nucleic acid binding	1	23	1347	9.38776	9.34184	0.0459145
GO:0031127	alpha-(1,2)-fucosyltransferase activity	1	4	22	1.63265	0.152576	1.48008
GO:0005529	sugar binding	1	2	33	0.816327	0.228865	0.587462
GO:0004721	phosphoprotein phosphatase activity	1	4	140	1.63265	0.970941	0.661712
GO:0004222	metalloendopeptidase activity	1	4	123	1.63265	0.853041	0.779612
GO:0042578	phosphoric ester hydrolase activity	1	4	219	1.63265	1.51883	0.113824
GO:0048037	cofactor binding	1	4	200	1.63265	1.38706	0.245594
GO:0016811	hydrolase activity, acting on carbon-nitrogen (but not peptide) bonds, in linear amides	1	2	35	0.816327	0.242735	0.573591
GO:0005488	binding	1	68	4477	27.7551	31.0493	-3.29421
GO:0022803	passive transmembrane transporter activity	1	4	310	1.63265	2.14994	-0.517288
GO:0043566	structure-specific DNA binding	1	1	25	0.408163	0.173382	0.234781
GO:0016278	lysine N-methyltransferase activity	1	2	16	0.816327	0.110965	0.705362
GO:0004725	protein tyrosine phosphatase activity	1	4	115	1.63265	0.797559	0.835094
GO:0004252	serine-type endopeptidase activity	1	2	88	0.816327	0.610306	0.206021
GO:0072341	modified amino acid binding	1	1	17	0.408163	0.1179	0.290263
GO:0018024	histone-lysine N-methyltransferase activity	1	2	16	0.816327	0.110965	0.705362
GO:0016758	transferase activity, transferring hexosyl groups	1	6	207	2.44898	1.43561	1.01337
GO:0016798	hydrolase activity, acting on glycosyl bonds	1	2	113	0.816327	0.783688	0.0326383
GO:0016597	amino acid binding	1	1	37	0.408163	0.256606	0.151557
GO:0003924	GTPase activity	1	2	204	0.816327	1.4148	-0.598473
GO:0004713	protein tyrosine kinase activity	1	6	325	2.44898	2.25397	0.195009
GO:0016791	phosphatase activity	1	4	186	1.63265	1.28996	0.342688
GO:0042623	ATPase activity, coupled	1	2	175	0.816327	1.21368	-0.39735
GO:0022838	substrate-specific channel activity	1	4	306	1.63265	2.1222	-0.489547
GO:0043176	amine binding	1	1	52	0.408163	0.360635	0.047528
GO:0017171	serine hydrolase activity	1	2	126	0.816327	0.873847	-0.0575205
GO:0005083	small GTPase regulator activity	1	2	71	0.816327	0.492406	0.323921
GO:0008168	methyltransferase activity	1	4	119	1.63265	0.8253	0.807353
GO:0022804	active transmembrane transporter activity	1	2	176	0.816327	1.22061	-0.404285
GO:0031406	carboxylic acid binding	1	1	59	0.408163	0.409182	-0.00101906
GO:0004674	protein serine/threonine kinase activity	1	8	448	3.26531	3.10701	0.158295
GO:0016628	oxidoreductase activity, acting on the CH-CH group of donors, NAD or NADP as acceptor	1	2	32	0.816327	0.221929	0.594397
GO:0016887	ATPase activity	1	2	239	0.816327	1.65754	-0.841209
GO:0046943	carboxylic acid transmembrane transporter activity	1	2	27	0.816327	0.187253	0.629074
GO:0016788	hydrolase activity, acting on ester bonds	1	6	439	2.44898	3.04459	-0.595614
GO:0042054	histone methyltransferase activity	1	2	18	0.816327	0.124835	0.691491
GO:0015077	monovalent inorganic cation transmembrane transporter activity	1	1	218	0.408163	1.51189	-1.10373
GO:0022890	inorganic cation transmembrane transporter activity	1	1	256	0.408163	1.77544	-1.36727
GO:0016279	protein-lysine N-methyltransferase activity	1	2	16	0.816327	0.110965	0.705362
GO:0005230	extracellular ligand-gated ion channel activity	1	4	114	1.63265	0.790623	0.84203
GO:0008146	sulfotransferase activity	1	2	35	0.816327	0.242735	0.573591
GO:0003690	double-stranded DNA binding	1	1	18	0.408163	0.124835	0.283328
GO:0035639	purine ribonucleoside triphosphate binding	1	8	1068	3.26531	7.40689	-4.14159
GO:0019842	vitamin binding	1	1	94	0.408163	0.651918	-0.243754
GO:0030234	enzyme regulator activity	1	2	189	0.816327	1.31077	-0.494444
GO:0008236	serine-type peptidase activity	1	2	126	0.816327	0.873847	-0.0575205
GO:0004175	endopeptidase activity	1	6	322	2.44898	2.23316	0.215815
GO:0016491	oxidoreductase activity	1	6	607	2.44898	4.20972	-1.76074
GO:0005515	protein binding	1	8	708	3.26531	4.91019	-1.64488
GO:0003824	catalytic activity	1	51	3934	20.8163	27.2834	-6.46712
GO:0017111	nucleoside-triphosphatase activity	1	4	528	1.63265	3.66184	-2.02918
GO:0003723	RNA binding	1	2	209	0.816327	1.44948	-0.63315
GO:0016772	transferase activity, transferring phosphorus-containing groups	1	8	673	3.26531	4.66745	-1.40215
GO:0046872	metal ion binding	1	34	1434	13.8776	9.94521	3.93234
GO:0016616	oxidoreductase activity, acting on the CH-OH group of donors, NAD or NADP as acceptor	1	2	66	0.816327	0.457729	0.358597
GO:0005215	transporter activity	1	7	776	2.85714	5.38179	-2.52465
GO:0004553	hydrolase activity, hydrolyzing O-glycosyl compounds	1	2	109	0.816327	0.755947	0.0603795
GO:0015075	ion transmembrane transporter activity	1	5	527	2.04082	3.6549	-1.61408
GO:0044212	transcription regulatory region DNA binding	1	17	550	6.93878	3.81441	3.12436
GO:0070011	peptidase activity, acting on L-amino acid peptides	1	9	435	3.67347	3.01685	0.656617
GO:0016818	hydrolase activity, acting on acid anhydrides, in phosphorus-containing anhydrides	1	4	545	1.63265	3.77974	-2.14708
GO:0016817	hydrolase activity, acting on acid anhydrides	1	4	548	1.63265	3.80054	-2.16789
GO:0032553	ribonucleotide binding	1	8	1110	3.26531	7.69818	-4.43287
GO:0017076	purine nucleotide binding	1	8	1111	3.26531	7.70511	-4.43981
GO:0003674	molecular_function	1	114	7725	46.5306	53.5751	-7.04453
GO:0016462	pyrophosphatase activity	1	4	544	1.63265	3.7728	-2.14015
GO:0032555	purine ribonucleotide binding	1	8	1110	3.26531	7.69818	-4.43287
GO:0000166	nucleotide binding	1	10	1180	4.08163	8.18365	-4.10201
GO:0008324	cation transmembrane transporter activity	1	1	382	0.408163	2.64928	-2.24112
GO:0004888	transmembrane signaling receptor activity	1	6	331	2.44898	2.29558	0.153397
GO:0043169	cation binding	1	34	1438	13.8776	9.97295	3.9046
GO:0008667	2,3-dihydro-2,3-dihydroxybenzoate dehydrogenase activity	1	2	32	0.816327	0.221929	0.594397
GO:0003865	3-oxo-5-alpha-steroid 4-dehydrogenase activity	1	2	3	0.816327	0.0208059	0.795521
GO:0015267	channel activity	1	4	310	1.63265	2.14994	-0.517288
GO:0008107	galactoside 2-alpha-L-fucosyltransferase activity	1	4	22	1.63265	0.152576	1.48008

## Sheet: GO term analysis (b)
Gene Ontology ID	Gene Ontology term	Corrected P-value	Number in young duplicate gene set	Number in set of all duplicates tested for masking	Percent in young duplicate gene set	Percent in set of all duplicates tested for masking	Percent difference
GO:0008270	zinc ion binding	0.00417217	34	87	13.8776	6.65138	7.22617
GO:0001071	nucleic acid binding transcription factor activity	0.0356884	17	47	6.93878	3.59327	3.3455
GO:0003707	steroid hormone receptor activity	0.0465466	17	33	6.93878	2.52294	4.41584
GO:0046914	transition metal ion binding	0.0944419	34	116	13.8776	8.8685	5.00905
GO:0016627	oxidoreductase activity, acting on the CH-CH group of donors	0.106801	4	6	1.63265	0.458716	1.17394
GO:0043167	ion binding	0.152362	34	145	13.8776	11.0856	2.79192
GO:0060089	molecular transducer activity	0.24414	25	95	10.2041	7.263	2.94108
GO:0004871	signal transducer activity	0.248574	25	95	10.2041	7.263	2.94108
GO:0004872	receptor activity	0.408156	23	87	9.38776	6.65138	2.73638
GO:0001067	regulatory region nucleic acid binding	1	17	47	6.93878	3.59327	3.3455
GO:0008417	fucosyltransferase activity	1	4	4	1.63265	0.30581	1.32684
GO:0016229	steroid dehydrogenase activity	1	2	2	0.816327	0.152905	0.663421
GO:0060589	nucleoside-triphosphatase regulator activity	1	2	3	0.816327	0.229358	0.586969
GO:0008276	protein methyltransferase activity	1	4	5	1.63265	0.382263	1.25039
GO:0003676	nucleic acid binding	1	23	104	9.38776	7.95107	1.43668
GO:0004568	chitinase activity	1	2	2	0.816327	0.152905	0.663421
GO:0030695	GTPase regulator activity	1	2	3	0.816327	0.229358	0.586969
GO:0004176	ATP-dependent peptidase activity	1	2	2	0.816327	0.152905	0.663421
GO:0008237	metallopeptidase activity	1	7	20	2.85714	1.52905	1.32809
GO:0000975	regulatory region DNA binding	1	17	47	6.93878	3.59327	3.3455
GO:0003700	sequence-specific DNA binding transcription factor activity	1	17	47	6.93878	3.59327	3.3455
GO:0003677	DNA binding	1	19	68	7.7551	5.19878	2.55633
GO:0043565	sequence-specific DNA binding	1	17	49	6.93878	3.74618	3.1926
GO:0015276	ligand-gated ion channel activity	1	4	21	1.63265	1.6055	0.0271485
GO:0016741	transferase activity, transferring one-carbon groups	1	4	11	1.63265	0.840979	0.791674
GO:0008233	peptidase activity	1	11	52	4.4898	3.97554	0.514261
GO:0046983	protein dimerization activity	1	2	4	0.816327	0.30581	0.510516
GO:0016757	transferase activity, transferring glycosyl groups	1	6	22	2.44898	1.68196	0.767022
GO:0070403	NAD+ binding	1	2	2	0.816327	0.152905	0.663421
GO:0005179	hormone activity	1	2	2	0.816327	0.152905	0.663421
GO:0004022	alcohol dehydrogenase (NAD) activity	1	2	2	0.816327	0.152905	0.663421
GO:0005275	amine transmembrane transporter activity	1	2	7	0.816327	0.535168	0.281158
GO:0051287	NAD binding	1	2	6	0.816327	0.458716	0.357611
GO:0022857	transmembrane transporter activity	1	7	107	2.85714	8.18043	-5.32329
GO:0050662	coenzyme binding	1	4	17	1.63265	1.29969	0.332959
GO:0016301	kinase activity	1	8	60	3.26531	4.58716	-1.32185
GO:0043621	protein self-association	1	1	1	0.408163	0.0764526	0.331711
GO:0016614	oxidoreductase activity, acting on CH-OH group of donors	1	2	8	0.816327	0.611621	0.204706
GO:0016740	transferase activity	1	20	141	8.16327	10.7798	-2.61655
GO:0005102	receptor binding	1	2	6	0.816327	0.458716	0.357611
GO:0016787	hydrolase activity	1	25	184	10.2041	14.0673	-3.8632
GO:0016888	endodeoxyribonuclease activity, producing 5'-phosphomonoesters	1	2	2	0.816327	0.152905	0.663421
GO:0016893	endonuclease activity, active with either ribo- or deoxyribonucleic acids and producing 5'-phosphomonoesters	1	2	2	0.816327	0.152905	0.663421
GO:0004672	protein kinase activity	1	8	54	3.26531	4.12844	-0.863134
GO:0016773	phosphotransferase activity, alcohol group as acceptor	1	8	63	3.26531	4.81651	-1.55121
GO:0030246	carbohydrate binding	1	4	16	1.63265	1.22324	0.409411
GO:0005342	organic acid transmembrane transporter activity	1	2	11	0.816327	0.840979	-0.0246521
GO:0022836	gated channel activity	1	4	29	1.63265	2.21713	-0.584472
GO:0004518	nuclease activity	1	2	6	0.816327	0.458716	0.357611
GO:0031177	phosphopantetheine binding	1	1	4	0.408163	0.30581	0.102353
GO:0022892	substrate-specific transporter activity	1	7	100	2.85714	7.64526	-4.78812
GO:0016782	transferase activity, transferring sulfur-containing groups	1	2	6	0.816327	0.458716	0.357611
GO:0004721	phosphoprotein phosphatase activity	1	4	12	1.63265	0.917431	0.715222
GO:0005216	ion channel activity	1	4	43	1.63265	3.28746	-1.65481
GO:0008757	S-adenosylmethionine-dependent methyltransferase activity	1	4	8	1.63265	0.611621	1.02103
GO:0004671	protein C-terminal S-isoprenylcysteine carboxyl O-methyltransferase activity	1	2	2	0.816327	0.152905	0.663421
GO:0016278	lysine N-methyltransferase activity	1	2	2	0.816327	0.152905	0.663421
GO:0015171	amino acid transmembrane transporter activity	1	2	6	0.816327	0.458716	0.357611
GO:0046933	hydrogen ion transporting ATP synthase activity, rotational mechanism	1	1	3	0.408163	0.229358	0.178805
GO:0005529	sugar binding	1	2	4	0.816327	0.30581	0.510516
GO:0030554	adenyl nucleotide binding	1	8	104	3.26531	7.95107	-4.68576
GO:0005524	ATP binding	1	8	104	3.26531	7.95107	-4.68576
GO:0032559	adenyl ribonucleotide binding	1	8	104	3.26531	7.95107	-4.68576
GO:0022834	ligand-gated channel activity	1	4	21	1.63265	1.6055	0.0271485
GO:0008171	O-methyltransferase activity	1	2	3	0.816327	0.229358	0.586969
GO:0043566	structure-specific DNA binding	1	1	1	0.408163	0.0764526	0.331711
GO:0022891	substrate-specific transmembrane transporter activity	1	7	94	2.85714	7.18654	-4.3294
GO:0022803	passive transmembrane transporter activity	1	4	43	1.63265	3.28746	-1.65481
GO:0016810	hydrolase activity, acting on carbon-nitrogen (but not peptide) bonds	1	2	8	0.816327	0.611621	0.204706
GO:0005488	binding	1	68	472	27.7551	36.0856	-8.33052
GO:0042578	phosphoric ester hydrolase activity	1	4	21	1.63265	1.6055	0.0271485
GO:0003880	protein C-terminal carboxyl O-methyltransferase activity	1	2	2	0.816327	0.152905	0.663421
GO:0038023	signaling receptor activity	1	23	85	9.38776	6.49847	2.88928
GO:0030234	enzyme regulator activity	1	2	9	0.816327	0.688073	0.128253
GO:0015078	hydrogen ion transmembrane transporter activity	1	1	13	0.408163	0.993884	-0.585721
GO:0016597	amino acid binding	1	1	8	0.408163	0.611621	-0.203458
GO:0016791	phosphatase activity	1	4	17	1.63265	1.29969	0.332959
GO:0004536	deoxyribonuclease activity	1	2	4	0.816327	0.30581	0.510516
GO:0004519	endonuclease activity	1	2	4	0.816327	0.30581	0.510516
GO:0016628	oxidoreductase activity, acting on the CH-CH group of donors, NAD or NADP as acceptor	1	2	2	0.816327	0.152905	0.663421
GO:0033765	steroid dehydrogenase activity, acting on the CH-CH group of donors	1	2	2	0.816327	0.152905	0.663421
GO:0022838	substrate-specific channel activity	1	4	43	1.63265	3.28746	-1.65481
GO:0003924	GTPase activity	1	2	20	0.816327	1.52905	-0.712725
GO:0000976	transcription regulatory region sequence-specific DNA binding	1	17	47	6.93878	3.59327	3.3455
GO:0004725	protein tyrosine phosphatase activity	1	4	10	1.63265	0.764526	0.868127
GO:0004222	metalloendopeptidase activity	1	4	14	1.63265	1.07034	0.562317
GO:0042623	ATPase activity, coupled	1	2	18	0.816327	1.37615	-0.55982
GO:0004252	serine-type endopeptidase activity	1	2	10	0.816327	0.764526	0.0518005
GO:0008170	N-methyltransferase activity	1	2	4	0.816327	0.30581	0.510516
GO:0072341	modified amino acid binding	1	1	4	0.408163	0.30581	0.102353
GO:0016788	hydrolase activity, acting on ester bonds	1	6	42	2.44898	3.21101	-0.76203
GO:0016616	oxidoreductase activity, acting on the CH-OH group of donors, NAD or NADP as acceptor	1	2	6	0.816327	0.458716	0.357611
GO:0004713	protein tyrosine kinase activity	1	6	38	2.44898	2.9052	-0.456219
GO:0016798	hydrolase activity, acting on glycosyl bonds	1	2	14	0.816327	1.07034	-0.25401
GO:0016279	protein-lysine N-methyltransferase activity	1	2	2	0.816327	0.152905	0.663421
GO:0042054	histone methyltransferase activity	1	2	2	0.816327	0.152905	0.663421
GO:0048037	cofactor binding	1	4	29	1.63265	2.21713	-0.584472
GO:0016887	ATPase activity	1	2	27	0.816327	2.06422	-1.24789
GO:0022890	inorganic cation transmembrane transporter activity	1	1	38	0.408163	2.9052	-2.49704
GO:0005230	extracellular ligand-gated ion channel activity	1	4	19	1.63265	1.4526	0.180054
GO:0022804	active transmembrane transporter activity	1	2	31	0.816327	2.37003	-1.5537
GO:0004175	endopeptidase activity	1	6	32	2.44898	2.44648	0.00249641
GO:0008168	methyltransferase activity	1	4	11	1.63265	0.840979	0.791674
GO:0015077	monovalent inorganic cation transmembrane transporter activity	1	1	34	0.408163	2.59939	-2.19123
GO:0016811	hydrolase activity, acting on carbon-nitrogen (but not peptide) bonds, in linear amides	1	2	7	0.816327	0.535168	0.281158
GO:0017171	serine hydrolase activity	1	2	19	0.816327	1.4526	-0.636273
GO:0005515	protein binding	1	8	70	3.26531	5.35168	-2.08638
GO:0046943	carboxylic acid transmembrane transporter activity	1	2	11	0.816327	0.840979	-0.0246521
GO:0016491	oxidoreductase activity	1	6	75	2.44898	5.73394	-3.28497
GO:0031406	carboxylic acid binding	1	1	14	0.408163	1.07034	-0.662173
GO:0043176	amine binding	1	1	15	0.408163	1.14679	-0.738626
GO:0017111	nucleoside-triphosphatase activity	1	4	59	1.63265	4.5107	-2.87805
GO:0008236	serine-type peptidase activity	1	2	19	0.816327	1.4526	-0.636273
GO:0016772	transferase activity, transferring phosphorus-containing groups	1	8	77	3.26531	5.88685	-2.62154
GO:0017076	purine nucleotide binding	1	8	123	3.26531	9.40367	-6.13836
GO:0032553	ribonucleotide binding	1	8	123	3.26531	9.40367	-6.13836
GO:0015075	ion transmembrane transporter activity	1	5	82	2.04082	6.26911	-4.2283
GO:0019842	vitamin binding	1	1	20	0.408163	1.52905	-1.12089
GO:0003723	RNA binding	1	2	19	0.816327	1.4526	-0.636273
GO:0070011	peptidase activity, acting on L-amino acid peptides	1	9	48	3.67347	3.66972	0.00374462
GO:0003824	catalytic activity	1	51	449	20.8163	34.3272	-13.5109
GO:0016817	hydrolase activity, acting on acid anhydrides	1	4	60	1.63265	4.58716	-2.9545
GO:0008324	cation transmembrane transporter activity	1	1	60	0.408163	4.58716	-4.17899
GO:0000166	nucleotide binding	1	10	135	4.08163	10.3211	-6.23947
GO:0005215	transporter activity	1	7	125	2.85714	9.55657	-6.69943
GO:0004888	transmembrane signaling receptor activity	1	6	52	2.44898	3.97554	-1.52656
GO:0003674	molecular_function	1	114	826	46.5306	63.1498	-16.6192
GO:0051998	protein carboxyl O-methyltransferase activity	1	2	3	0.816327	0.229358	0.586969
GO:0004520	endodeoxyribonuclease activity	1	2	4	0.816327	0.30581	0.510516
GO:0004553	hydrolase activity, hydrolyzing O-glycosyl compounds	1	2	14	0.816327	1.07034	-0.25401
GO:0018024	histone-lysine N-methyltransferase activity	1	2	2	0.816327	0.152905	0.663421
GO:0035639	purine ribonucleoside triphosphate binding	1	8	123	3.26531	9.40367	-6.13836
GO:0005083	small GTPase regulator activity	1	2	3	0.816327	0.229358	0.586969
GO:0004674	protein serine/threonine kinase activity	1	8	54	3.26531	4.12844	-0.863134
GO:0043169	cation binding	1	34	145	13.8776	11.0856	2.79192
GO:0008667	2,3-dihydro-2,3-dihydroxybenzoate dehydrogenase activity	1	2	2	0.816327	0.152905	0.663421
GO:0016462	pyrophosphatase activity	1	4	60	1.63265	4.58716	-2.9545
GO:0016818	hydrolase activity, acting on acid anhydrides, in phosphorus-containing anhydrides	1	4	60	1.63265	4.58716	-2.9545
GO:0016758	transferase activity, transferring hexosyl groups	1	6	22	2.44898	1.68196	0.767022
GO:0044212	transcription regulatory region DNA binding	1	17	47	6.93878	3.59327	3.3455
GO:0032555	purine ribonucleotide binding	1	8	123	3.26531	9.40367	-6.13836
GO:0015267	channel activity	1	4	43	1.63265	3.28746	-1.65481
GO:0010340	carboxyl-O-methyltransferase activity	1	2	3	0.816327	0.229358	0.586969
GO:0046872	metal ion binding	1	34	145	13.8776	11.0856	2.79192
GO:0008146	sulfotransferase activity	1	2	6	0.816327	0.458716	0.357611
GO:0008107	galactoside 2-alpha-L-fucosyltransferase activity	1	4	4	1.63265	0.30581	1.32684
GO:0003690	double-stranded DNA binding	1	1	1	0.408163	0.0764526	0.331711
GO:0031127	alpha-(1,2)-fucosyltransferase activity	1	4	4	1.63265	0.30581	1.32684
GO:0003865	3-oxo-5-alpha-steroid 4-dehydrogenase activity	1	2	2	0.816327	0.152905	0.663421
