# Supplementary material for: Duplication and Retention Biases of Essential and Non-Essential Genes Revealed by Systematic Knockdown Analyses
Source: PLoS Genet. 2013 May 9;9(5):e1003330. doi: 10.1371/journal.pgen.1003330 (PMC3649981; doi:10.1371/journal.pgen.1003330)
Supplement: Table S3 — Single and double RNAi phenotypes for the 790 C. elegans duplicate pairs screened in this study. (XLS) [file pgen.1003330.s009.xls]

## Sheet: Table S3
Table S3 Single and double RNAi phenotypes for the 790 C. elegans duplicate pairs screened in this study.
See Materials and Methods for details of reagent selection/target prediction, phenotype scoring and phenotype quantification.
Columns A-B give the RNAi reagent(s) used and the corresponding gene(s) uniquely targeted.
Columns C-E give the generation observed, penetrance scored and phenotype scored respectively.
na, not applicable indicates that experiment could not be scored (e.g. F1 brood cannot be scored if P0 worms are sterile); sevr (severe); mod (moderate).
RNAi Clone(s)	Gene(s)	Generation	RNAi Penetrance	RNAi Phenotype
sjj_AH9.4	AH9.4	P0		WT
sjj_AH9.4	AH9.4	F1		WT
sjj_AH9.4 : sjj_F54E4.2	AH9.4 : F54E4.2	P0		WT
sjj_AH9.4 : sjj_F54E4.2	AH9.4 : F54E4.2	F1		WT
sjj_B0041.2	B0041.2	P0		WT
sjj_B0041.2	B0041.2	F1		WT
sjj_B0041.2 : sjj_C06G1.4	B0041.2 : C06G1.4	P0		Lvl L2
sjj_B0041.2 : sjj_C06G1.4	B0041.2 : C06G1.4	F1		na
sjj_B0207.6	B0207.6	F1		Gro mod
sjj_B0207.6	B0207.6	F1	50--90	Unc mild
sjj_B0207.6	B0207.6	F1	10--20	Rup
sjj_B0207.6	B0207.6	P0	20--50	Emb
mv_Y75B8A.14 : sjj_B0207.6	B0207.6 : Y75B8A.14	F1		Gro mod
mv_Y75B8A.14 : sjj_B0207.6	B0207.6 : Y75B8A.14	F1	50--90	Unc mild
mv_Y75B8A.14 : sjj_B0207.6	B0207.6 : Y75B8A.14	F1	10--20	Rup
mv_Y75B8A.14 : sjj_B0207.6	B0207.6 : Y75B8A.14	P0		Lbd
sjj_B0212.1	B0212.1	P0		WT
sjj_B0212.1	B0212.1	F1		WT
sjj_B0212.1 : sjj_F14B8.5	B0212.1 : F14B8.7	P0		WT
sjj_B0212.1 : sjj_F14B8.5	B0212.1 : F14B8.7	F1		WT
sjj_B0212.2	B0212.2	P0		WT
sjj_B0212.2	B0212.2	F1		WT
sjj_B0212.2 : sjj_T13F2.5	B0212.2 : T13F2.5	P0		WT
sjj_B0212.2 : sjj_T13F2.5	B0212.2 : T13F2.5	F1		WT
sjj_B0213.7	B0213.7	P0		WT
sjj_B0213.7	B0213.7	F1		WT
sjj_B0213.7 : sjj_B0213.8	B0213.7 : B0213.8	P0		WT
sjj_B0213.7 : sjj_B0213.8	B0213.7 : B0213.8	F1		WT
sjj_B0213.8	B0213.8	P0		WT
sjj_B0213.8	B0213.8	F1		WT
mv_B0218.3	B0218.3	P0		WT
mv_B0218.3	B0218.3	F1		WT
mv_B0218.3 : sjj_F42G8.3	B0218.3 : F42G8.3	P0		WT
mv_B0218.3 : sjj_F42G8.3	B0218.3 : F42G8.3	F1		WT
sjj_B0222.4	B0222.4	P0		WT
sjj_B0222.4	B0222.4	F1		WT
sjj_B0222.4 : sjj_Y66H1B.4	B0222.4 : Y66H1B.4	F1		Gro mod
sjj_B0222.4 : sjj_Y66H1B.4	B0222.4 : Y66H1B.4	P0		WT
sjj_B0272.2	B0272.2	P0		WT
sjj_B0272.2	B0272.2	F1		WT
sjj_B0272.2 : sjj_M03E7.5	B0272.2 : M03E7.5	F1		Gro mod
sjj_B0272.2 : sjj_M03E7.5	B0272.2 : M03E7.5	F1	90-100	Unc sevr
sjj_B0272.2 : sjj_M03E7.5	B0272.2 : M03E7.5	P0		WT
sjj_B0272.4	B0272.4	P0		WT
sjj_B0272.4	B0272.4	F1		WT
sjj_B0272.4 : sjj_R06F6.9	B0272.4 : R06F6.9	P0		WT
sjj_B0272.4 : sjj_R06F6.9	B0272.4 : R06F6.9	F1		WT
sjj_B0280.4	B0280.4	P0		WT
sjj_B0280.4	B0280.4	F1		WT
sjj_B0280.4 : sjj_C34H3.a	B0280.4 : C34H3.2	F1		Gro mod
sjj_B0280.4 : sjj_C34H3.a	B0280.4 : C34H3.2	F1	50--90	Unc mild
sjj_B0280.4 : sjj_C34H3.a	B0280.4 : C34H3.2	F1	5--10	Rup
sjj_B0280.4 : sjj_C34H3.a	B0280.4 : C34H3.2	P0		WT
sjj_B0281.3	B0281.3	P0		WT
sjj_B0281.3	B0281.3	F1		WT
sjj_B0281.3 : sjj_K09F6.7	B0281.3 : K09F6.7	P0		WT
sjj_B0281.3 : sjj_K09F6.7	B0281.3 : K09F6.7	F1		WT
sjj_B0284.2	B0284.2	P0		WT
sjj_B0284.2	B0284.2	F1		WT
sjj_B0284.2 : sjj_B0284.4	B0284.2 : B0284.4	P0		WT
sjj_B0284.2 : sjj_B0284.4	B0284.2 : B0284.4	F1		WT
sjj_B0284.4	B0284.4	P0		WT
sjj_B0284.4	B0284.4	F1		WT
sjj_B0285.6	B0285.6	P0		WT
sjj_B0285.6	B0285.6	F1		WT
sjj_B0285.6 : sjj_R107.1	B0285.6 : R107.1	P0		WT
sjj_B0285.6 : sjj_R107.1	B0285.6 : R107.1	F1		WT
sjj_B0285.8	B0285.8	P0		WT
sjj_B0285.8	B0285.8	F1		WT
sjj_B0285.8 : sjj_B0285.9	B0285.8 : B0285.9	P0		WT
sjj_B0285.8 : sjj_B0285.9	B0285.8 : B0285.9	F1		WT
sjj_B0285.9	B0285.9	P0		WT
sjj_B0285.9	B0285.9	F1		WT
mv_B0303.2	B0303.2	P0		WT
mv_B0303.2	B0303.2	F1		WT
mv_B0303.2 : sjj_T07C12.9	B0303.2 : T07C12.9	P0		WT
mv_B0303.2 : sjj_T07C12.9	B0303.2 : T07C12.9	F1		WT
sjj_B0304.5	B0304.5	P0		WT
sjj_B0304.5	B0304.5	F1		WT
sjj_B0304.5 : sjj_B0304.6	B0304.5 : B0304.6	P0		WT
sjj_B0304.5 : sjj_B0304.6	B0304.5 : B0304.6	F1		WT
sjj_B0304.6	B0304.6	P0		WT
sjj_B0304.6	B0304.6	F1		WT
sjj_B0310.5	B0310.5	P0		WT
sjj_B0310.5	B0310.5	F1		WT
sjj_B0310.5 : sjj_R04B5.9	B0310.5 : R04B5.9	P0		WT
sjj_B0310.5 : sjj_R04B5.9	B0310.5 : R04B5.9	F1		WT
sjj_B0334.4	B0334.4	P0		WT
sjj_B0334.4	B0334.4	F1		WT
sjj_B0334.4 : sjj_F15D3.6	B0334.4 : F15D3.6	F1		Gro mod
sjj_B0334.4 : sjj_F15D3.6	B0334.4 : F15D3.6	P0		WT
sjj_B0336.2	B0336.2	P0		Gro L3
sjj_B0336.2	B0336.2	P0		Lvl L3
sjj_B0336.2	B0336.2	F1		na
sjj_B0336.2 : sjj_F57H12.1	B0336.2 : F57H12.1	P0		Gro L2
sjj_B0336.2 : sjj_F57H12.1	B0336.2 : F57H12.1	P0		Lvl L2
sjj_B0336.2 : sjj_F57H12.1	B0336.2 : F57H12.1	F1		na
sjj_B0365.3	B0365.3	F1		Gro sevr
sjj_B0365.3	B0365.3	P0		Gro L2
sjj_B0365.3 : sjj_C01G12.8	B0365.3 : C01G12.8	F1		Gro sevr
sjj_B0365.3 : sjj_C01G12.8	B0365.3 : C01G12.8	P0		Gro L2
sjj_B0403.4	B0403.4	F1		Gro sevr
sjj_B0403.4	B0403.4	P0		Adl
sjj_B0403.4	B0403.4	P0	5--10	Emb
sjj_B0403.4 : sjj_Y49E10.4	B0403.4 : Y49E10.4	F1		Gro sevr
sjj_B0403.4 : sjj_Y49E10.4	B0403.4 : Y49E10.4	P0	5--10	Emb
sjj_B0416.1	B0416.1	P0		WT
sjj_B0416.1	B0416.1	F1		WT
sjj_B0416.1 : sjj_T13G4.e	B0416.1 : T13G4.3	P0		WT
sjj_B0416.1 : sjj_T13G4.e	B0416.1 : T13G4.3	F1		WT
sjj_B0416.2	B0416.2	P0		WT
sjj_B0416.2	B0416.2	F1		WT
sjj_B0416.2 : sjj_ZK856.6	B0416.2 : ZK856.6	P0		WT
sjj_B0416.2 : sjj_ZK856.6	B0416.2 : ZK856.6	F1		WT
sjj_B0416.5	B0416.5	P0		WT
sjj_B0416.5	B0416.5	F1		WT
sjj_B0416.5 : sjj_C42C1.8	B0416.5 : C42C1.8	P0	50-90	Emb
sjj_B0416.5 : sjj_C42C1.8	B0416.5 : C42C1.8	F1		Gro sevr
sjj_B0416.5 : sjj_C42C1.8	B0416.5 : C42C1.8	F1	10-20	Lvl
sjj_B0416.6	B0416.6	P0		WT
sjj_B0416.6	B0416.6	F1		WT
sjj_B0416.6 : sjj_M01F1.1	B0416.6 : M01F1.1	P0		WT
sjj_B0416.6 : sjj_M01F1.1	B0416.6 : M01F1.1	F1		WT
sjj_B0432.2	B0432.2	P0		WT
sjj_B0432.2	B0432.2	F1		WT
mv_C49G7.11 : sjj_B0432.2	B0432.2 : C49G7.11	P0		WT
mv_C49G7.11 : sjj_B0432.2	B0432.2 : C49G7.11	F1		WT
sjj_B0432.4	B0432.4	P0		WT
sjj_B0432.4	B0432.4	F1		WT
sjj_B0432.4 : sjj_K11G12.5	B0432.4 : K11G12.5	P0		WT
sjj_B0432.4 : sjj_K11G12.5	B0432.4 : K11G12.5	F1		WT
sjj_B0454.6	B0454.6	P0		WT
sjj_B0454.6	B0454.6	F1		WT
sjj_B0454.6 : sjj_F23F1.6	B0454.6 : F23F1.6	P0		WT
sjj_B0454.6 : sjj_F23F1.6	B0454.6 : F23F1.6	F1		WT
sjj_B0457.2	B0457.2	P0		WT
sjj_B0457.2	B0457.2	F1		WT
sjj_B0457.2 : sjj_C38C6.3	B0457.2 : C38C6.3	F1		Gro mod
sjj_B0457.2 : sjj_C38C6.3	B0457.2 : C38C6.3	F1	10--20	Lvl
sjj_B0457.2 : sjj_C38C6.3	B0457.2 : C38C6.3	P0		WT
mv_B0462.1	B0462.1	P0		WT
mv_B0462.1	B0462.1	F1		WT
mv_B0462.1 : sjj_Y102A5C.4	B0462.1 : Y102A5C.4	P0		WT
mv_B0462.1 : sjj_Y102A5C.4	B0462.1 : Y102A5C.4	F1		WT
sjj_B0464.1	B0464.1	P0		Gro L2
sjj_B0464.1	B0464.1	F1		na
sjj_B0464.1 : sjj_F22D6.3	B0464.1 : F22D6.3	P0		Gro L2
sjj_B0464.1 : sjj_F22D6.3	B0464.1 : F22D6.3	F1		na
sjj_B0464.3	B0464.3	P0		WT
sjj_B0464.3	B0464.3	F1		WT
sjj_B0464.3 : sjj_C24A3.2	B0464.3 : C24A3.2	P0		WT
sjj_B0464.3 : sjj_C24A3.2	B0464.3 : C24A3.2	F1		WT
sjj_B0491.8	B0491.8	P0		WT
sjj_B0491.8	B0491.8	F1		WT
sjj_B0491.8 : sjj_T27D12.2	B0491.8 : T27D12.2	P0		WT
sjj_B0491.8 : sjj_T27D12.2	B0491.8 : T27D12.2	F1		WT
sjj_B0495.1	B0495.1	P0		WT
sjj_B0495.1	B0495.1	F1		WT
sjj_B0495.1 : sjj_C41C4.2	B0495.1 : C41C4.2	P0		WT
sjj_B0495.1 : sjj_C41C4.2	B0495.1 : C41C4.2	F1		WT
sjj_B0495.2	B0495.2	P0		WT
sjj_B0495.2	B0495.2	F1		WT
sjj_B0495.2 : sjj_ZC504.3	B0495.2 : ZC504.3	P0		Gro L3
sjj_B0495.2 : sjj_ZC504.3	B0495.2 : ZC504.3	F1		na
sjj_B0495.4	B0495.4	F1		Gro sevr
sjj_B0495.4	B0495.4	P0		Sma
sjj_B0495.4 : sjj_F58E1.6	B0495.4 : F58E1.6	F1		Gro sevr
sjj_B0495.4 : sjj_F58E1.6	B0495.4 : F58E1.6	P0		Sma
sjj_B0495.7	B0495.7	F1	50--90	Unc mild
sjj_B0495.7	B0495.7	P0		WT
sjj_B0495.7 : sjj_C44B7.11	B0495.7 : C44B7.11	F1	50--90	Unc mild
sjj_B0495.7 : sjj_C44B7.11	B0495.7 : C44B7.11	P0		WT
sjj_B0507.6	B0507.6	P0		WT
sjj_B0507.6	B0507.6	F1		WT
sjj_B0507.6 : sjj_F53H2.1	B0507.6 : F53H2.1	P0		WT
sjj_B0507.6 : sjj_F53H2.1	B0507.6 : F53H2.1	F1		WT
sjj_B0523.1	B0523.1	P0		WT
sjj_B0523.1	B0523.1	F1		WT
sjj_B0523.1 : sjj_T06C10.6	B0523.1 : T06C10.6	P0		WT
sjj_B0523.1 : sjj_T06C10.6	B0523.1 : T06C10.6	F1		WT
sjj_B0546.1	B0546.1	P0		WT
sjj_B0546.1	B0546.1	F1		WT
sjj_B0546.1 : sjj_K10B3.9	B0546.1 : K10B3.9	P0		WT
sjj_B0546.1 : sjj_K10B3.9	B0546.1 : K10B3.9	F1		WT
sjj_B0547.4	B0547.4	P0		WT
sjj_B0547.4	B0547.4	F1		WT
sjj_B0547.4 : sjj_C06G8.4	B0547.4 : C06G8.4	P0		WT
sjj_B0547.4 : sjj_C06G8.4	B0547.4 : C06G8.4	F1		WT
sjj_B0564.7	B0564.11	P0		WT
sjj_B0564.7	B0564.11	F1		WT
sjj_B0564.7 : sjj_Y75B8A.10	B0564.11 : Y75B8A.10	P0		WT
sjj_B0564.7 : sjj_Y75B8A.10	B0564.11 : Y75B8A.10	F1		WT
sjj_C01B12.1	C01B12.1	F1	90--100	Lon
sjj_C01B12.1	C01B12.1	P0		WT
sjj_C01B12.1 : sjj_C27H5.5	C01B12.1 : C27H5.5	F1	90--100	Lon
sjj_C01B12.1 : sjj_C27H5.5	C01B12.1 : C27H5.5	P0		WT
sjj_C01B12.3	C01B12.3	P0		WT
sjj_C01B12.3	C01B12.3	F1		WT
sjj_C01B12.3 : sjj_C01B12.5	C01B12.3 : C01B12.5	P0		WT
sjj_C01B12.3 : sjj_C01B12.5	C01B12.3 : C01B12.5	F1		WT
sjj_C01B12.4	C01B12.4	P0		WT
sjj_C01B12.4	C01B12.4	F1		WT
sjj_C01B12.4 : sjj_W01D2.5	C01B12.4 : W01D2.5	P0		WT
sjj_C01B12.4 : sjj_W01D2.5	C01B12.4 : W01D2.5	F1		WT
sjj_C01B12.5	C01B12.5	P0		WT
sjj_C01B12.5	C01B12.5	F1		WT
sjj_C01C10.3	C01C10.3	P0		WT
sjj_C01C10.3	C01C10.3	F1		WT
sjj_C01C10.3 : sjj_F08G5.2	C01C10.3 : F08G5.2	P0		WT
sjj_C01C10.3 : sjj_F08G5.2	C01C10.3 : F08G5.2	F1		WT
sjj_C01F1.4	C01F1.4	P0		WT
sjj_C01F1.4	C01F1.4	F1		WT
sjj_C01F1.4 : sjj_H02I12.3	C01F1.4 : H02I12.3	P0		WT
sjj_C01F1.4 : sjj_H02I12.3	C01F1.4 : H02I12.3	F1		WT
sjj_C01F1.6	C01F1.6	P0		WT
sjj_C01F1.6	C01F1.6	F1		WT
sjj_C01F1.6 : sjj_C18F10.7	C01F1.6 : C18F10.7	P0		WT
sjj_C01F1.6 : sjj_C18F10.7	C01F1.6 : C18F10.7	F1		WT
sjj_C01G10.2	C01G10.2	P0		WT
sjj_C01G10.2	C01G10.2	F1		WT
sjj_C01G10.2 : sjj_C01G10.3	C01G10.2 : C01G10.3	P0		WT
sjj_C01G10.2 : sjj_C01G10.3	C01G10.2 : C01G10.3	F1		WT
sjj_C01G10.3	C01G10.3	P0		WT
sjj_C01G10.3	C01G10.3	F1		WT
sjj_C01G12.3	C01G12.3	P0		WT
sjj_C01G12.3	C01G12.3	F1		WT
sjj_C01G12.3 : sjj_F44G4.5	C01G12.3 : F44G4.5	P0		WT
sjj_C01G12.3 : sjj_F44G4.5	C01G12.3 : F44G4.5	F1		WT
sjj_C01G12.8	C01G12.8	P0		WT
sjj_C01G12.8	C01G12.8	F1		WT
sjj_C01H6.4	C01H6.4	P0		WT
sjj_C01H6.4	C01H6.4	F1		WT
sjj_C01H6.4 : sjj_C46H11.2	C01H6.4 : C46H11.2	P0		WT
sjj_C01H6.4 : sjj_C46H11.2	C01H6.4 : C46H11.2	F1		WT
sjj_C02B4.1	C02B4.1	P0		WT
sjj_C02B4.1	C02B4.1	F1		WT
sjj_C02B4.1 : sjj_F08C6.1	C02B4.1 : F08C6.1	P0		Gro L2
sjj_C02B4.1 : sjj_F08C6.1	C02B4.1 : F08C6.1	F1		na
sjj_C02B8.4	C02B8.4	F1		Gro mild
sjj_C02B8.4	C02B8.4	F1	20--50	Adl
sjj_C02B8.4	C02B8.4	P0		WT
sjj_C02B8.4 : sjj_C28C12.8	C02B8.4 : C28C12.8	P0		Pvl
sjj_C02B8.4 : sjj_C28C12.8	C02B8.4 : C28C12.8	P0		Ste
sjj_C02B8.4 : sjj_C28C12.8	C02B8.4 : C28C12.8	P0		Adl
sjj_C02B8.4 : sjj_C28C12.8	C02B8.4 : C28C12.8	F1		na
sjj_C02C2.4	C02C2.4	P0		WT
sjj_C02C2.4	C02C2.4	F1		WT
sjj_C02C2.4 : sjj_T28F3.4	C02C2.4 : T28F3.4	P0		WT
sjj_C02C2.4 : sjj_T28F3.4	C02C2.4 : T28F3.4	F1		WT
sjj_C02C6.1	C02C6.1	P0		Gro L4
sjj_C02C6.1	C02C6.1	F1		na
sjj_C02C6.1 : sjj_T12E12.4	C02C6.1 : T12E12.4	P0		Gro L4
sjj_C02C6.1 : sjj_T12E12.4	C02C6.1 : T12E12.4	F1		na
sjj_C02D5.3	C02D5.3	P0		WT
sjj_C02D5.3	C02D5.3	F1		WT
sjj_C02D5.3 : sjj_F13A7.10	C02D5.3 : F13A7.10	P0		WT
sjj_C02D5.3 : sjj_F13A7.10	C02D5.3 : F13A7.10	F1		WT
sjj_C03A7.11	C03A7.11	P0		WT
sjj_C03A7.11	C03A7.11	F1		WT
sjj_C03A7.11 : sjj_F56B3.7	C03A7.11 : F56B3.7	P0		WT
sjj_C03A7.11 : sjj_F56B3.7	C03A7.11 : F56B3.7	F1		WT
sjj_C03E10.1	C03E10.1	P0		WT
sjj_C03E10.1	C03E10.1	F1		WT
sjj_C03E10.1 : sjj_T03F7.6	C03E10.1 : T03F7.6	P0		WT
sjj_C03E10.1 : sjj_T03F7.6	C03E10.1 : T03F7.6	F1		WT
sjj_C03G5.1	C03G5.1	F1		Gro sevr
sjj_C03G5.1	C03G5.1	P0		WT
sjj_C03G5.1 : sjj_C34B2.7	C03G5.1 : C34B2.7	P0		Lbd
sjj_C03G5.1 : sjj_C34B2.7	C03G5.1 : C34B2.7	P0	50-90	Emb
sjj_C03G5.1 : sjj_C34B2.7	C03G5.1 : C34B2.7	F1		Gro mild
sjj_C03G6.16	C03G6.16	P0		WT
sjj_C03G6.16	C03G6.16	F1		WT
sjj_C03G6.16 : sjj_Y62E10A.b	C03G6.16 : Y62E10A.4	P0		WT
sjj_C03G6.16 : sjj_Y62E10A.b	C03G6.16 : Y62E10A.4	F1		WT
sjj_C03G6.3	C03G6.3	P0		WT
sjj_C03G6.3	C03G6.3	F1		WT
sjj_C03G6.3 : sjj_R13D7.3	C03G6.3 : R13D7.3	P0		WT
sjj_C03G6.3 : sjj_R13D7.3	C03G6.3 : R13D7.3	F1		WT
sjj_C03G6.6	C03G6.6	P0		WT
sjj_C03G6.6	C03G6.6	F1		WT
sjj_C03G6.6 : sjj_C04F1.1	C03G6.6 : C04F1.1	P0		WT
sjj_C03G6.6 : sjj_C04F1.1	C03G6.6 : C04F1.1	F1		WT
sjj_C03G6.7	C03G6.7	P0		WT
sjj_C03G6.7	C03G6.7	F1		WT
sjj_C03G6.7 : sjj_C32B5.2	C03G6.7 : C32B5.2	P0		WT
sjj_C03G6.7 : sjj_C32B5.2	C03G6.7 : C32B5.2	F1		WT
sjj_C03H5.4	C03H5.4	P0		WT
sjj_C03H5.4	C03H5.4	F1		WT
sjj_C03H5.4 : sjj_C07E3.9	C03H5.4 : C07E3.9	P0		WT
sjj_C03H5.4 : sjj_C07E3.9	C03H5.4 : C07E3.9	F1		WT
sjj_C04B4.2	C04B4.2	P0		WT
sjj_C04B4.2	C04B4.2	F1		WT
sjj_C04B4.2 : sjj_C04B4.4	C04B4.2 : C04B4.4	P0		WT
sjj_C04B4.2 : sjj_C04B4.4	C04B4.2 : C04B4.4	F1		WT
sjj_C04B4.3	C04B4.3	P0		WT
sjj_C04B4.3	C04B4.3	F1		WT
sjj_C04B4.3 : sjj_F45E6.4	C04B4.3 : F45E6.4	P0		WT
sjj_C04B4.3 : sjj_F45E6.4	C04B4.3 : F45E6.4	F1		WT
sjj_C04B4.4	C04B4.4	P0		WT
sjj_C04B4.4	C04B4.4	F1		WT
sjj_C04C3.3	C04C3.3	P0	90--100	Emb
sjj_C04C3.3	C04C3.3	F1		na
sjj_C04C3.3 : sjj_F27D4.5	C04C3.3 : F27D4.5	P0	50--90	Emb
sjj_C04C3.3 : sjj_F27D4.5	C04C3.3 : F27D4.5	F1		na
sjj_C04E6.2	C04E6.2	P0		WT
sjj_C04E6.2	C04E6.2	F1		WT
sjj_C04E6.2 : sjj_F58D7.1	C04E6.2 : F58D7.1	P0		WT
sjj_C04E6.2 : sjj_F58D7.1	C04E6.2 : F58D7.1	F1		WT
sjj_C04E7.2	C04E7.2	P0		WT
sjj_C04E7.2	C04E7.2	F1		WT
sjj_C04E7.2 : sjj_K02F6.7	C04E7.2 : K02F6.7	P0		WT
sjj_C04E7.2 : sjj_K02F6.7	C04E7.2 : K02F6.7	F1		WT
sjj_C04F1.1	C04F1.1	P0		WT
sjj_C04F1.1	C04F1.1	F1		WT
sjj_C04F12.8	C04F12.8	P0		WT
sjj_C04F12.8	C04F12.8	F1		WT
sjj_C04F12.8 : sjj_F26A3.4	C04F12.8 : F26A3.4	P0		WT
sjj_C04F12.8 : sjj_F26A3.4	C04F12.8 : F26A3.4	F1		WT
sjj_C04F5.1	C04F5.1	P0		WT
sjj_C04F5.1	C04F5.1	F1		WT
sjj_C04F5.1 : sjj_ZK721.1	C04F5.1 : ZK721.1	P0		WT
sjj_C04F5.1 : sjj_ZK721.1	C04F5.1 : ZK721.1	F1		WT
sjj_C04F5.4	C04F5.4	P0		WT
sjj_C04F5.4	C04F5.4	F1		WT
sjj_C04F5.4 : sjj_C04F5.5	C04F5.4 : C04F5.5	P0		WT
sjj_C04F5.4 : sjj_C04F5.5	C04F5.4 : C04F5.5	F1		WT
sjj_C04F5.5	C04F5.5	P0		WT
sjj_C04F5.5	C04F5.5	F1		WT
sjj_C04F5.7	C04F5.7	P0		WT
sjj_C04F5.7	C04F5.7	F1		WT
sjj_C04F5.7 : sjj_C07G3.9	C04F5.7 : C07G3.9	P0		WT
sjj_C04F5.7 : sjj_C07G3.9	C04F5.7 : C07G3.9	F1		WT
sjj_C04F6.4	C04F6.4	F1		Gro mod
sjj_C04F6.4	C04F6.4	F1	50-90	Unc mild
sjj_C04F6.4	C04F6.4	P0		WT
sjj_C04F6.4 : sjj_K08F9.2	C04F6.4 : K08F9.2	P0		Ste
sjj_C04F6.4 : sjj_K08F9.2	C04F6.4 : K08F9.2	P0		Lon
sjj_C04F6.4 : sjj_K08F9.2	C04F6.4 : K08F9.2	F1		na
sjj_C04G2.10	C04G2.10	P0		WT
sjj_C04G2.10	C04G2.10	F1		WT
sjj_C04G2.10 : sjj_Y48B6A.10	C04G2.10 : Y48B6A.10	P0		WT
sjj_C04G2.10 : sjj_Y48B6A.10	C04G2.10 : Y48B6A.10	F1		WT
sjj_C04G2.6	C04G2.6	P0		Pvl
sjj_C04G2.6	C04G2.6	P0		Ste
sjj_C04G2.6	C04G2.6	F1		na
sjj_C04G2.6 : sjj_F48E8.6	C04G2.6 : F48E8.6	P0		Pvl
sjj_C04G2.6 : sjj_F48E8.6	C04G2.6 : F48E8.6	P0		Ste
sjj_C04G2.6 : sjj_F48E8.6	C04G2.6 : F48E8.6	F1		na
sjj_C04H5.2	C04H5.2	P0		WT
sjj_C04H5.2	C04H5.2	F1		WT
sjj_C04H5.2 : sjj_EEED8.11	C04H5.2 : EEED8.11	P0		WT
sjj_C04H5.2 : sjj_EEED8.11	C04H5.2 : EEED8.11	F1		WT
sjj_C05C10.1	C05C10.1	P0		WT
sjj_C05C10.1	C05C10.1	F1		WT
sjj_C05C10.1 : sjj_C05C10.4	C05C10.1 : C05C10.4	P0		WT
sjj_C05C10.1 : sjj_C05C10.4	C05C10.1 : C05C10.4	F1		WT
sjj_C05C10.4	C05C10.4	P0		WT
sjj_C05C10.4	C05C10.4	F1		WT
sjj_C05C12.3	C05C12.3	P0		Gro
sjj_C05C12.3	C05C12.3	F1		Gro sevr
sjj_C05C12.3 : sjj_T01H8.5	C05C12.3 : T01H8.5	P0		Gro L4
sjj_C05C12.3 : sjj_T01H8.5	C05C12.3 : T01H8.5	P0		Pvl
sjj_C05C12.3 : sjj_T01H8.5	C05C12.3 : T01H8.5	P0		Ste
sjj_C05C12.3 : sjj_T01H8.5	C05C12.3 : T01H8.5	F1		na
sjj_C05C8.7	C05C8.7	P0		Gro L2
sjj_C05C8.7	C05C8.7	F1		na
mv_ZK632.4 : sjj_C05C8.7	C05C8.7 : ZK632.4	P0		Gro L2
mv_ZK632.4 : sjj_C05C8.7	C05C8.7 : ZK632.4	F1		na
sjj_C05C9.1	C05C9.1	P0		WT
sjj_C05C9.1	C05C9.1	F1		WT
sjj_C05C9.1 : sjj_T19C3.5	C05C9.1 : T19C3.5	P0		WT
sjj_C05C9.1 : sjj_T19C3.5	C05C9.1 : T19C3.5	F1		WT
sjj_C05D12.4	C05D12.4	P0		WT
sjj_C05D12.4	C05D12.4	F1		WT
sjj_C05D12.4 : sjj_C05D12.5	C05D12.4 : C05D12.5	P0		WT
sjj_C05D12.4 : sjj_C05D12.5	C05D12.4 : C05D12.5	F1		WT
sjj_C05D12.5	C05D12.5	P0		WT
sjj_C05D12.5	C05D12.5	F1		WT
sjj_C05D2.3	C05D2.3	P0		WT
sjj_C05D2.3	C05D2.3	F1		WT
sjj_C05D2.3 : sjj_C05D2.4	C05D2.3 : C05D2.4	P0		WT
sjj_C05D2.3 : sjj_C05D2.4	C05D2.3 : C05D2.4	F1		WT
sjj_C05D2.4	C05D2.4	P0		WT
sjj_C05D2.4	C05D2.4	F1		WT
sjj_C05E11.4	C05E11.4	P0		WT
sjj_C05E11.4	C05E11.4	F1		WT
sjj_C05E11.4 : sjj_C05E11.5	C05E11.4 : C05E11.5	P0		WT
sjj_C05E11.4 : sjj_C05E11.5	C05E11.4 : C05E11.5	F1		WT
sjj_C05E11.5	C05E11.5	P0		WT
sjj_C05E11.5	C05E11.5	F1		WT
sjj_C05E7.1	C05E7.1	P0		WT
sjj_C05E7.1	C05E7.1	F1		WT
mv_C05E7.2 : sjj_C05E7.1	C05E7.1 : C05E7.2	P0		WT
mv_C05E7.2 : sjj_C05E7.1	C05E7.1 : C05E7.2	F1		WT
mv_C05E7.2	C05E7.2	P0		WT
mv_C05E7.2	C05E7.2	F1		WT
sjj_C05G5.4	C05G5.4	P0		WT
sjj_C05G5.4	C05G5.4	F1		WT
sjj_C05G5.4 : sjj_F23H11.3	C05G5.4 : F23H11.3	P0		Lbd
sjj_C05G5.4 : sjj_F23H11.3	C05G5.4 : F23H11.3	F1		Gro sevr
sjj_C06A5.8	C06A5.8	P0		WT
sjj_C06A5.8	C06A5.8	F1		WT
sjj_C06A5.8 : sjj_C06A5.9	C06A5.8 : C06A5.9	P0		WT
sjj_C06A5.8 : sjj_C06A5.9	C06A5.8 : C06A5.9	F1		WT
sjj_C06A5.9	C06A5.9	P0		WT
sjj_C06A5.9	C06A5.9	F1		WT
sjj_C06A6.5	C06A6.5	P0		WT
sjj_C06A6.5	C06A6.5	F1		WT
sjj_C06A6.5 : sjj_C30H7.2	C06A6.5 : C30H7.2	P0		WT
sjj_C06A6.5 : sjj_C30H7.2	C06A6.5 : C30H7.2	F1		WT
sjj_C06A8.6	C06A8.6	P0		WT
sjj_C06A8.6	C06A8.6	F1		WT
sjj_C06A8.6 : sjj_T09A5.9	C06A8.6 : T09A5.9	P0		Adl
sjj_C06A8.6 : sjj_T09A5.9	C06A8.6 : T09A5.9	P0		Ste
sjj_C06A8.6 : sjj_T09A5.9	C06A8.6 : T09A5.9	F1		na
sjj_C06A8.9	C06A8.9	P0		WT
sjj_C06A8.9	C06A8.9	F1		WT
sjj_C06A8.9 : sjj_K10D3.1	C06A8.9 : K10D3.1	P0		WT
sjj_C06A8.9 : sjj_K10D3.1	C06A8.9 : K10D3.1	F1		WT
sjj_C06B3.6	C06B3.6	P0		WT
sjj_C06B3.6	C06B3.6	F1		WT
sjj_C06B3.6 : sjj_F13A7.11	C06B3.6 : F13A7.11	P0		WT
sjj_C06B3.6 : sjj_F13A7.11	C06B3.6 : F13A7.11	F1		WT
sjj_C06E2.3	C06E2.3	P0		WT
sjj_C06E2.3	C06E2.3	F1		WT
sjj_C06E2.3 : sjj_F40G9.3	C06E2.3 : F40G9.3	P0		WT
sjj_C06E2.3 : sjj_F40G9.3	C06E2.3 : F40G9.3	F1		WT
sjj_C06G1.4	C06G1.4	F1		Gro mod
sjj_C06G1.4	C06G1.4	F1		Unc sevr
sjj_C06G1.4	C06G1.4	P0		WT
sjj_C06G3.1	C06G3.1	P0		WT
sjj_C06G3.1	C06G3.1	F1		WT
sjj_C06G3.1 : sjj_E02H1.7	C06G3.1 : E02H1.7	P0		WT
sjj_C06G3.1 : sjj_E02H1.7	C06G3.1 : E02H1.7	F1		WT
sjj_C06G3.5	C06G3.5	P0		WT
sjj_C06G3.5	C06G3.5	F1		WT
sjj_C06G3.5 : sjj_C44B7.10	C06G3.5 : C44B7.12	P0		WT
sjj_C06G3.5 : sjj_C44B7.10	C06G3.5 : C44B7.12	F1		WT
sjj_C06G8.3	C06G8.3	P0		WT
sjj_C06G8.3	C06G8.3	F1		WT
sjj_C06G8.3 : sjj_F30B5.3	C06G8.3 : F30B5.7	P0		WT
sjj_C06G8.3 : sjj_F30B5.3	C06G8.3 : F30B5.7	F1		WT
sjj_C06G8.4	C06G8.4	P0		WT
sjj_C06G8.4	C06G8.4	F1		WT
sjj_C07A12.4	C07A12.4	F1		Gro sevr
sjj_C07A12.4	C07A12.4	F1	20-50	Unc mild
sjj_C07A12.4	C07A12.4	P0		WT
sjj_C07A12.4 : sjj_C14B1.1	C07A12.4 : C14B1.1	P0		Lvl L4
sjj_C07A12.4 : sjj_C14B1.1	C07A12.4 : C14B1.1	P0		Dpy mild
sjj_C07A12.4 : sjj_C14B1.1	C07A12.4 : C14B1.1	P0		Sma
sjj_C07A12.4 : sjj_C14B1.1	C07A12.4 : C14B1.1	F1		na
sjj_C07B5.3	C07B5.3	P0		WT
sjj_C07B5.3	C07B5.3	F1		WT
sjj_C07B5.3 : sjj_F17C11.2	C07B5.3 : F17C11.2	P0		WT
sjj_C07B5.3 : sjj_F17C11.2	C07B5.3 : F17C11.2	F1		WT
sjj_C07B5.5	C07B5.5	P0		WT
sjj_C07B5.5	C07B5.5	F1		WT
sjj_C07B5.5 : sjj_K04H4.6	C07B5.5 : K04H4.6	P0		WT
sjj_C07B5.5 : sjj_K04H4.6	C07B5.5 : K04H4.6	F1		WT
sjj_C07E3.9	C07E3.9	P0		WT
sjj_C07E3.9	C07E3.9	F1		WT
sjj_C07F11.d	C07F11.2	P0		WT
sjj_C07F11.d	C07F11.2	F1		WT
sjj_C07F11.d : sjj_F32B5.6	C07F11.2 : F32B5.6	P0		WT
sjj_C07F11.d : sjj_F32B5.6	C07F11.2 : F32B5.6	F1		WT
sjj_C07G1.1	C07G1.1	P0		WT
sjj_C07G1.1	C07G1.1	F1		WT
sjj_C07G1.1 : sjj_ZK546.15	C07G1.1 : ZK546.15	P0		WT
sjj_C07G1.1 : sjj_ZK546.15	C07G1.1 : ZK546.15	F1		WT
sjj_C07G2.3	C07G2.3	P0		Gro L3
sjj_C07G2.3	C07G2.3	P0		Lvl L2
sjj_C07G2.3	C07G2.3	F1		na
sjj_C07G2.3 : sjj_K01C8.10	C07G2.3 : K01C8.10	P0		Gro L3
sjj_C07G2.3 : sjj_K01C8.10	C07G2.3 : K01C8.10	P0		Lvl L2
sjj_C07G2.3 : sjj_K01C8.10	C07G2.3 : K01C8.10	F1		na
sjj_C07G3.9	C07G3.9	P0		WT
sjj_C07G3.9	C07G3.9	F1		WT
sjj_C08A9.9	C08A9.9	P0		WT
sjj_C08A9.9	C08A9.9	F1		WT
sjj_C08A9.9 : sjj_K09E3.5	C08A9.9 : K09E3.5	P0		WT
sjj_C08A9.9 : sjj_K09E3.5	C08A9.9 : K09E3.5	F1		WT
sjj_C08B6.5	C08B6.5	P0		WT
sjj_C08B6.5	C08B6.5	F1		WT
sjj_C08B6.5 : sjj_ZK867.2	C08B6.5 : ZK867.2	P0		WT
sjj_C08B6.5 : sjj_ZK867.2	C08B6.5 : ZK867.2	F1		WT
sjj_C08F8.4	C08F8.4	P0		WT
sjj_C08F8.4	C08F8.4	F1		WT
sjj_C08F8.4 : sjj_C54G7.2	C08F8.4 : C54G7.2	P0		WT
sjj_C08F8.4 : sjj_C54G7.2	C08F8.4 : C54G7.2	F1		WT
sjj_C08H9.1	C08H9.1	P0		WT
sjj_C08H9.1	C08H9.1	F1		WT
sjj_C08H9.1 : sjj_F32A5.3	C08H9.1 : F32A5.3	P0		WT
sjj_C08H9.1 : sjj_F32A5.3	C08H9.1 : F32A5.3	F1		WT
sjj_C09B8.4	C09B8.4	P0		WT
sjj_C09B8.4	C09B8.4	F1		WT
sjj_C09B8.4 : sjj_T10B11.6	C09B8.4 : T10B11.6	P0		WT
sjj_C09B8.4 : sjj_T10B11.6	C09B8.4 : T10B11.6	F1		WT
sjj_C09B9.2	C09B9.2	P0		WT
sjj_C09B9.2	C09B9.2	F1		WT
sjj_C09B9.2 : sjj_Y53C10A.11	C09B9.2 : F58D5.8	P0		WT
sjj_C09B9.2 : sjj_Y53C10A.11	C09B9.2 : F58D5.8	F1		WT
sjj_C09B9.4	C09B9.4	P0		WT
sjj_C09B9.4	C09B9.4	F1		WT
sjj_C09B9.4 : sjj_C49C3.2	C09B9.4 : C49C3.2	P0		WT
sjj_C09B9.4 : sjj_C49C3.2	C09B9.4 : C49C3.2	F1		WT
sjj_C09C7.1	C09C7.1	P0		WT
sjj_C09C7.1	C09C7.1	F1		WT
sjj_C09C7.1 : sjj_C14F5.2	C09C7.1 : C14F5.2	P0		WT
sjj_C09C7.1 : sjj_C14F5.2	C09C7.1 : C14F5.2	F1		WT
sjj_C09F12.1	C09F12.1	P0		WT
sjj_C09F12.1	C09F12.1	F1		WT
sjj_C09F12.1 : sjj_T05A10.2	C09F12.1 : T05A10.2	P0		WT
sjj_C09F12.1 : sjj_T05A10.2	C09F12.1 : T05A10.2	F1		WT
sjj_C09F9.1	C09F9.1	P0		WT
sjj_C09F9.1	C09F9.1	F1		WT
sjj_C09F9.1 : sjj_F38A5.8	C09F9.1 : F38A5.8	P0		WT
sjj_C09F9.1 : sjj_F38A5.8	C09F9.1 : F38A5.8	F1		WT
sjj_C09G5.7	C09G5.7	P0		WT
sjj_C09G5.7	C09G5.7	F1		WT
sjj_C09G5.7 : sjj_C54G4.2	C09G5.7 : C54G4.2	P0		WT
sjj_C09G5.7 : sjj_C54G4.2	C09G5.7 : C54G4.2	F1		WT
sjj_C09H10.6	C09H10.6	P0		WT
sjj_C09H10.6	C09H10.6	F1		WT
sjj_C09H10.6 : sjj_C50B6.2	C09H10.6 : C50B6.2	P0	10-20	Emb
sjj_C09H10.6 : sjj_C50B6.2	C09H10.6 : C50B6.2	F1	10-20	Unc sevr
sjj_C09H10.6 : sjj_C50B6.2	C09H10.6 : C50B6.2	F1		Gro mod
sjj_C09H5.4	C09H5.4	P0		WT
sjj_C09H5.4	C09H5.4	F1		WT
sjj_C09H5.4 : sjj_C09H5.5	C09H5.4 : C09H5.5	P0		WT
sjj_C09H5.4 : sjj_C09H5.5	C09H5.4 : C09H5.5	F1		WT
sjj_C09H5.5	C09H5.5	P0		WT
sjj_C09H5.5	C09H5.5	F1		WT
sjj_C09H5.9	C09H5.9	P0		WT
sjj_C09H5.9	C09H5.9	F1		WT
sjj_C09H5.9 : sjj_F58G4.5	C09H5.9 : F58G4.5	P0		WT
sjj_C09H5.9 : sjj_F58G4.5	C09H5.9 : F58G4.5	F1		WT
sjj_C10A4.1	C10A4.1	P0		WT
sjj_C10A4.1	C10A4.1	F1		WT
sjj_C10A4.1 : sjj_K09A11.1	C10A4.1 : K09A11.1	P0		WT
sjj_C10A4.1 : sjj_K09A11.1	C10A4.1 : K09A11.1	F1		WT
sjj_C10C6.3	C10C6.3	P0		WT
sjj_C10C6.3	C10C6.3	F1		WT
sjj_C10C6.3 : sjj_C15H7.4	C10C6.3 : C15H7.4	P0		WT
sjj_C10C6.3 : sjj_C15H7.4	C10C6.3 : C15H7.4	F1		WT
sjj_C10E2.6	C10E2.6	F1		Gro sevr
sjj_C10E2.6	C10E2.6	P0		WT
sjj_C10E2.6 : sjj_T02G5.12	C10E2.6 : T02G5.12	F1		Gro mild
sjj_C10E2.6 : sjj_T02G5.12	C10E2.6 : T02G5.12	P0		WT
sjj_C10G11.8	C10G11.8	P0		WT
sjj_C10G11.8	C10G11.8	F1		WT
mv_F29G9.5 : sjj_C10G11.8	C10G11.8 : F29G9.5	P0		Gro L1
mv_F29G9.5 : sjj_C10G11.8	C10G11.8 : F29G9.5	P0		Lvl L1
mv_F29G9.5 : sjj_C10G11.8	C10G11.8 : F29G9.5	F1		na
sjj_C10H11.9	C10H11.9	P0		Pvl
sjj_C10H11.9	C10H11.9	P0		Ste
sjj_C10H11.9	C10H11.9	F1		na
sjj_C10H11.9 : sjj_K08B12.5	C10H11.9 : K08B12.5	P0		Pvl
sjj_C10H11.9 : sjj_K08B12.5	C10H11.9 : K08B12.5	P0		Ste
sjj_C10H11.9 : sjj_K08B12.5	C10H11.9 : K08B12.5	P0		Gro mod
sjj_C10H11.9 : sjj_K08B12.5	C10H11.9 : K08B12.5	F1		na
sjj_C11E4.3	C11E4.3	P0		WT
sjj_C11E4.3	C11E4.3	F1		WT
sjj_C11E4.3 : sjj_C46A5.2	C11E4.3 : C46A5.2	P0		WT
sjj_C11E4.3 : sjj_C46A5.2	C11E4.3 : C46A5.2	F1		WT
sjj_C12D5.9	C12D5.9	P0		WT
sjj_C12D5.9	C12D5.9	F1		WT
sjj_C12D5.9 : sjj_R13D7.2	C12D5.9 : R13D7.2	P0		WT
sjj_C12D5.9 : sjj_R13D7.2	C12D5.9 : R13D7.2	F1		WT
sjj_C12D8.1	C12D8.1	P0		WT
sjj_C12D8.1	C12D8.1	F1		WT
sjj_C12D8.1 : sjj_ZK418.9	C12D8.1 : ZK418.9	P0		Gro L3
sjj_C12D8.1 : sjj_ZK418.9	C12D8.1 : ZK418.9	P0		Lvl L3
sjj_C12D8.1 : sjj_ZK418.9	C12D8.1 : ZK418.9	F1		na
sjj_C12D8.10	C12D8.10	P0		WT
sjj_C12D8.10	C12D8.10	F1		na
mv_F28H6.1 : sjj_C12D8.10	C12D8.10 : F28H6.1	P0		Lbd
mv_F28H6.1 : sjj_C12D8.10	C12D8.10 : F28H6.1	F1		Gro sevr
sjj_C13B9.4	C13B9.4	P0		WT
sjj_C13B9.4	C13B9.4	F1		WT
sjj_C13B9.4 : sjj_C18B12B.1	C13B9.4 : C18B12.2	P0		WT
sjj_C13B9.4 : sjj_C18B12B.1	C13B9.4 : C18B12.2	F1		WT
sjj_C13C12.1	C13C12.1	P0		WT
sjj_C13C12.1	C13C12.1	F1		WT
mv_M02B7.6 : sjj_C13C12.1	C13C12.1 : M02B7.6	P0		WT
mv_M02B7.6 : sjj_C13C12.1	C13C12.1 : M02B7.6	F1		WT
mv_C13C4.4	C13C4.4	P0		WT
mv_C13C4.4	C13C4.4	F1		WT
mv_C13C4.4 : sjj_K08B12.3	C13C4.4 : K08B12.3	P0		WT
mv_C13C4.4 : sjj_K08B12.3	C13C4.4 : K08B12.3	F1		WT
sjj_C13D9.1	C13D9.1	P0		WT
sjj_C13D9.1	C13D9.1	F1		WT
sjj_C13D9.1 : sjj_C13D9.2	C13D9.1 : C13D9.2	P0		WT
sjj_C13D9.1 : sjj_C13D9.2	C13D9.1 : C13D9.2	F1		WT
sjj_C13D9.2	C13D9.2	P0		WT
sjj_C13D9.2	C13D9.2	F1		WT
sjj_C13D9.7	C13D9.7	P0		WT
sjj_C13D9.7	C13D9.7	F1		WT
sjj_C13D9.7 : sjj_C13D9.8	C13D9.7 : C13D9.8	P0		WT
sjj_C13D9.7 : sjj_C13D9.8	C13D9.7 : C13D9.8	F1		WT
sjj_C13D9.8	C13D9.8	P0		WT
sjj_C13D9.8	C13D9.8	F1		WT
sjj_C13G3.3	C13G3.3	P0		WT
sjj_C13G3.3	C13G3.3	F1		WT
sjj_C13G3.3 : sjj_W08G11.4	C13G3.3 : W08G11.4	P0		Gro L4
sjj_C13G3.3 : sjj_W08G11.4	C13G3.3 : W08G11.4	P0		Pvl
sjj_C13G3.3 : sjj_W08G11.4	C13G3.3 : W08G11.4	F1		na
sjj_C14A4.13	C14A4.13	P0		WT
sjj_C14A4.13	C14A4.13	F1		WT
sjj_C14A4.13 : sjj_W03G9.5	C14A4.13 : W03G9.5	P0		WT
sjj_C14A4.13 : sjj_W03G9.5	C14A4.13 : W03G9.5	F1		WT
sjj_C14A4.6	C14A4.6	P0		WT
sjj_C14A4.6	C14A4.6	F1		WT
mv_C14A4.7 : sjj_C14A4.6	C14A4.6 : C14A4.7	P0		WT
mv_C14A4.7 : sjj_C14A4.6	C14A4.6 : C14A4.7	F1		WT
mv_C14A4.7	C14A4.7	P0		WT
mv_C14A4.7	C14A4.7	F1		WT
sjj_C14B1.1	C14B1.1	P0		WT
sjj_C14B1.1	C14B1.1	F1		WT
sjj_C14B9.1	C14B9.1	P0		WT
sjj_C14B9.1	C14B9.1	F1		WT
sjj_C14B9.1 : sjj_T22A3.2	C14B9.1 : T22A3.2	P0		WT
sjj_C14B9.1 : sjj_T22A3.2	C14B9.1 : T22A3.2	F1		WT
sjj_C14B9.2	C14B9.2	P0		Gro L3
sjj_C14B9.2	C14B9.2	F1		na
sjj_C14B9.2 : sjj_H06O01.1	C14B9.2 : H06O01.1	P0		Gro L3
sjj_C14B9.2 : sjj_H06O01.1	C14B9.2 : H06O01.1	F1		na
sjj_C14B9.3	C14B9.3	P0		WT
sjj_C14B9.3	C14B9.3	F1		WT
mv_F36H9.5 : sjj_C14B9.3	C14B9.3 : F36H9.5	P0		WT
mv_F36H9.5 : sjj_C14B9.3	C14B9.3 : F36H9.5	F1		WT
sjj_C14C11.5	C14C11.5	P0		WT
sjj_C14C11.5	C14C11.5	F1		WT
sjj_C14C11.5 : sjj_W05B10.5	C14C11.5 : W05B10.5	P0		WT
sjj_C14C11.5 : sjj_W05B10.5	C14C11.5 : W05B10.5	F1		WT
mv_C14C6.3	C14C6.3	P0		WT
mv_C14C6.3	C14C6.3	F1		WT
mv_C14C6.3 : sjj_K06H6.6	C14C6.3 : K06H6.6	P0		WT
mv_C14C6.3 : sjj_K06H6.6	C14C6.3 : K06H6.6	F1		WT
sjj_C14C6.4	C14C6.4	P0		WT
sjj_C14C6.4	C14C6.4	F1		WT
sjj_C14C6.4 : sjj_ZK488.4	C14C6.4 : ZK488.4	P0		WT
sjj_C14C6.4 : sjj_ZK488.4	C14C6.4 : ZK488.4	F1		WT
sjj_C14F5.2	C14F5.2	P0		WT
sjj_C14F5.2	C14F5.2	F1		WT
sjj_C15B12.5	C15B12.5	P0		WT
sjj_C15B12.5	C15B12.5	F1		WT
sjj_C15B12.5 : sjj_F47D12.2	C15B12.5 : F47D12.1	P0		WT
sjj_C15B12.5 : sjj_F47D12.2	C15B12.5 : F47D12.1	F1		WT
sjj_C15C6.2	C15C6.2	P0		WT
sjj_C15C6.2	C15C6.2	F1		WT
mv_R09E10.6 : sjj_C15C6.2	C15C6.2 : R09E10.6	P0		WT
mv_R09E10.6 : sjj_C15C6.2	C15C6.2 : R09E10.6	F1		WT
sjj_C15C8.5	C15C8.5	P0		WT
sjj_C15C8.5	C15C8.5	F1		WT
sjj_C15C8.5 : sjj_F44D12.2	C15C8.5 : F44D12.2	P0		WT
sjj_C15C8.5 : sjj_F44D12.2	C15C8.5 : F44D12.2	F1		WT
sjj_C15F1.b	C15F1.7	P0		WT
sjj_C15F1.b	C15F1.7	F1		WT
sjj_C15F1.b : sjj_ZK430.3	C15F1.7 : ZK430.3	P0		WT
sjj_C15F1.b : sjj_ZK430.3	C15F1.7 : ZK430.3	F1		WT
sjj_C15H11.2	C15H11.2	P0		WT
sjj_C15H11.2	C15H11.2	F1		WT
sjj_C15H11.2 : sjj_Y105C5A.u	C15H11.2 : Y105C5A.23	P0		WT
sjj_C15H11.2 : sjj_Y105C5A.u	C15H11.2 : Y105C5A.23	F1		WT
sjj_C15H7.4	C15H7.4	P0		WT
sjj_C15H7.4	C15H7.4	F1		WT
sjj_C16A11.2	C16A11.2	P0		WT
sjj_C16A11.2	C16A11.2	F1		WT
sjj_C16A11.2 : sjj_C31E10.6	C16A11.2 : C31E10.6	P0		WT
sjj_C16A11.2 : sjj_C31E10.6	C16A11.2 : C31E10.6	F1		WT
sjj_C16C8.11	C16C8.11	P0		WT
sjj_C16C8.11	C16C8.11	F1		WT
sjj_C16C8.11 : sjj_C16C8.4	C16C8.11 : C16C8.4	P0		WT
sjj_C16C8.11 : sjj_C16C8.4	C16C8.11 : C16C8.4	F1		WT
sjj_C16C8.2	C16C8.2	P0		WT
sjj_C16C8.2	C16C8.2	F1		WT
sjj_C16C8.2 : sjj_F49E12.1	C16C8.2 : F49E12.1	P0		WT
sjj_C16C8.2 : sjj_F49E12.1	C16C8.2 : F49E12.1	F1		WT
sjj_C16C8.4	C16C8.4	P0		WT
sjj_C16C8.4	C16C8.4	F1		WT
sjj_C16D6.2	C16D6.2	P0		WT
sjj_C16D6.2	C16D6.2	F1		WT
sjj_C16D6.2 : sjj_C53C7.1	C16D6.2 : C53C7.1	P0		WT
sjj_C16D6.2 : sjj_C53C7.1	C16D6.2 : C53C7.1	F1		WT
sjj_C16D9.7	C16D9.7	P0		WT
sjj_C16D9.7	C16D9.7	F1		WT
sjj_C16D9.7 : sjj_C24B9.2	C16D9.7 : C24B9.2	P0		WT
sjj_C16D9.7 : sjj_C24B9.2	C16D9.7 : C24B9.2	F1		WT
sjj_C17A2.7	C17A2.7	P0		WT
sjj_C17A2.7	C17A2.7	F1		WT
sjj_C17A2.7 : sjj_R09H10.2	C17A2.7 : R09H10.2	P0		WT
sjj_C17A2.7 : sjj_R09H10.2	C17A2.7 : R09H10.2	F1		WT
sjj_C17E7.5	C17E7.5	P0		WT
sjj_C17E7.5	C17E7.5	F1		WT
sjj_C17E7.5 : sjj_C17E7.6	C17E7.5 : C17E7.6	P0		WT
sjj_C17E7.5 : sjj_C17E7.6	C17E7.5 : C17E7.6	F1		WT
sjj_C17E7.6	C17E7.6	P0		WT
sjj_C17E7.6	C17E7.6	F1		WT
sjj_C18B10.1	C18B10.1	P0		WT
sjj_C18B10.1	C18B10.1	F1		WT
sjj_C18B10.1 : sjj_C18B10.2	C18B10.1 : C18B10.2	P0		WT
sjj_C18B10.1 : sjj_C18B10.2	C18B10.1 : C18B10.2	F1		WT
sjj_C18B10.2	C18B10.2	P0		WT
sjj_C18B10.2	C18B10.2	F1		WT
sjj_C18B12B.1	C18B12.2	P0		WT
sjj_C18B12B.1	C18B12.2	F1		WT
sjj_C18B12.5	C18B12.5	P0		WT
sjj_C18B12.5	C18B12.5	F1		WT
sjj_C18B12.5 : sjj_H03G16.4	C18B12.5 : H03G16.4	P0		WT
sjj_C18B12.5 : sjj_H03G16.4	C18B12.5 : H03G16.4	F1		WT
sjj_C18B2.4	C18B2.4	P0		WT
sjj_C18B2.4	C18B2.4	F1		WT
sjj_C18B2.4 : sjj_D2013.6	C18B2.4 : D2013.6	P0		Ste
sjj_C18B2.4 : sjj_D2013.6	C18B2.4 : D2013.6	F1		na
sjj_C18F10.7	C18F10.7	P0		WT
sjj_C18F10.7	C18F10.7	F1		WT
sjj_C18G1.4	C18G1.4	P0		WT
sjj_C18G1.4	C18G1.4	F1		WT
sjj_C18G1.4 : sjj_ZK381.4	C18G1.4 : ZK381.4	P0		WT
sjj_C18G1.4 : sjj_ZK381.4	C18G1.4 : ZK381.4	F1		WT
sjj_C18H2.1	C18H2.1	P0		WT
sjj_C18H2.1	C18H2.1	F1		WT
sjj_C18H2.1 : sjj_F37A4.4	C18H2.1 : F37A4.4	P0	10--20	Emb
sjj_C18H2.1 : sjj_F37A4.4	C18H2.1 : F37A4.4	F1	5--10	Bmd
sjj_C18H2.1 : sjj_F37A4.4	C18H2.1 : F37A4.4	F1	50--90	Unc mild
sjj_C18H2.1 : sjj_F37A4.4	C18H2.1 : F37A4.4	F1		Gro mod
sjj_C23H5.7	C23H5.7	P0		WT
sjj_C23H5.7	C23H5.7	F1		WT
sjj_C23H5.7 : sjj_Y76B12C_69.b	C23H5.7 : Y76B12C.1	P0		WT
sjj_C23H5.7 : sjj_Y76B12C_69.b	C23H5.7 : Y76B12C.1	F1		WT
sjj_C24A3.2	C24A3.2	P0		WT
sjj_C24A3.2	C24A3.2	F1		WT
sjj_C24A3.3	C24A3.4	P0		WT
sjj_C24A3.3	C24A3.4	F1		WT
mv_ZK892.4 : sjj_C24A3.3	C24A3.4 : ZK892.4	P0		WT
mv_ZK892.4 : sjj_C24A3.3	C24A3.4 : ZK892.4	F1		WT
sjj_C24B5.1	C24B5.1	P0		WT
sjj_C24B5.1	C24B5.1	F1		WT
sjj_C24B5.1 : sjj_F16C3.1	C24B5.1 : F16C3.1	P0		WT
sjj_C24B5.1 : sjj_F16C3.1	C24B5.1 : F16C3.1	F1		WT
sjj_C24B5.2	C24B5.2	P0		WT
sjj_C24B5.2	C24B5.2	F1		WT
mv_F32D1.1 : sjj_C24B5.2	C24B5.2 : F32D1.1	P0		WT
mv_F32D1.1 : sjj_C24B5.2	C24B5.2 : F32D1.1	F1		WT
sjj_C24B5.3	C24B5.3	P0		WT
sjj_C24B5.3	C24B5.3	F1		WT
sjj_C24B5.3 : sjj_F31F6.5	C24B5.3 : F31F6.5	P0		Gro L2
sjj_C24B5.3 : sjj_F31F6.5	C24B5.3 : F31F6.5	P0	90-100	Lvl
sjj_C24B5.3 : sjj_F31F6.5	C24B5.3 : F31F6.5	F1		Gro mod
sjj_C24B9.12	C24B9.12	P0		WT
sjj_C24B9.12	C24B9.12	F1		WT
sjj_C24B9.12 : sjj_ZK678.6	C24B9.12 : ZK678.6	P0		WT
sjj_C24B9.12 : sjj_ZK678.6	C24B9.12 : ZK678.6	F1		WT
sjj_C24B9.2	C24B9.2	P0		WT
sjj_C24B9.2	C24B9.2	F1		WT
sjj_C25A1.7	C25A1.7	P0		Ste
sjj_C25A1.7	C25A1.7	P0		Adl
sjj_C25A1.7	C25A1.7	P0		Pvl
sjj_C25A1.7	C25A1.7	F1		na
sjj_C25A1.7 : sjj_R11A8.6	C25A1.7 : R11A8.6	P0		Gro L4
sjj_C25A1.7 : sjj_R11A8.6	C25A1.7 : R11A8.6	F1		na
mv_C25D7.7	C25D7.7	P0		WT
mv_C25D7.7	C25D7.7	F1		WT
mv_C25D7.7 : sjj_C27B7.8	C25D7.7 : C27B7.8	F1	20-50	Pvl
mv_C25D7.7 : sjj_C27B7.8	C25D7.7 : C27B7.8	F1	20-50	Rup
mv_C25D7.7 : sjj_C27B7.8	C25D7.7 : C27B7.8	P0		WT
sjj_C25E10.8	C25E10.8	P0		WT
sjj_C25E10.8	C25E10.8	F1		WT
sjj_C25E10.8 : sjj_C25E10.9	C25E10.8 : C25E10.9	P0		WT
sjj_C25E10.8 : sjj_C25E10.9	C25E10.8 : C25E10.9	F1		WT
sjj_C25E10.9	C25E10.9	P0		WT
sjj_C25E10.9	C25E10.9	F1		WT
sjj_C25F6.4	C25F6.4	P0		WT
sjj_C25F6.4	C25F6.4	F1		WT
sjj_C25F6.4 : sjj_F11D5.3	C25F6.4 : F11D5.3	P0		WT
sjj_C25F6.4 : sjj_F11D5.3	C25F6.4 : F11D5.3	F1		WT
sjj_C25G4.4	C25G4.4	P0		WT
sjj_C25G4.4	C25G4.4	F1		WT
sjj_C25G4.4 : sjj_C44F1.2	C25G4.4 : C44F1.2	P0		WT
sjj_C25G4.4 : sjj_C44F1.2	C25G4.4 : C44F1.2	F1		WT
mv_C25G4.8	C25G4.8	P0		WT
mv_C25G4.8	C25G4.8	F1		WT
mv_C25G4.8 : sjj_T16A9.3	C25G4.8 : T16A9.3	P0		WT
mv_C25G4.8 : sjj_T16A9.3	C25G4.8 : T16A9.3	F1		WT
sjj_C26E6.2	C26E6.2	P0		WT
sjj_C26E6.2	C26E6.2	F1		WT
sjj_C26E6.2 : sjj_Y11D7A.13	C26E6.2 : Y11D7A.13	P0	5-10	Emb
sjj_C26E6.2 : sjj_Y11D7A.13	C26E6.2 : Y11D7A.13	F1		Gro sevr
sjj_C26E6.2 : sjj_Y11D7A.13	C26E6.2 : Y11D7A.13	F1	20-50	Unc mild
sjj_C26E6.4	C26E6.4	P0		Gro L2
sjj_C26E6.4	C26E6.4	F1		na
sjj_C26E6.4 : sjj_F09F7.3	C26E6.4 : F09F7.3	P0		Gro L2
sjj_C26E6.4 : sjj_F09F7.3	C26E6.4 : F09F7.3	F1		na
sjj_C27A7.1	C27A7.1	P0		WT
sjj_C27A7.1	C27A7.1	F1		WT
sjj_C27A7.1 : sjj_C27A7.3	C27A7.1 : C27A7.3	P0		WT
sjj_C27A7.1 : sjj_C27A7.3	C27A7.1 : C27A7.3	F1		WT
sjj_C27A7.3	C27A7.3	P0		WT
sjj_C27A7.3	C27A7.3	F1		WT
sjj_C27A7.7	C27A7.7	P0		WT
sjj_C27A7.7	C27A7.7	F1		WT
sjj_C27A7.7 : sjj_VC27A7L.1	C27A7.7 : VC27A7L.1	P0		WT
sjj_C27A7.7 : sjj_VC27A7L.1	C27A7.7 : VC27A7L.1	F1		WT
sjj_C27B7.8	C27B7.8	F1	10-20	Unc mild
sjj_C27B7.8	C27B7.8	F1	10-20	Pvl
sjj_C27B7.8	C27B7.8	F1	10-20	Rup
sjj_C27B7.8	C27B7.8	P0		WT
sjj_C27C12.7	C27C12.7	P0		WT
sjj_C27C12.7	C27C12.7	F1		WT
sjj_C27C12.7 : sjj_T23F1.7	C27C12.7 : T23F1.7	P0		WT
sjj_C27C12.7 : sjj_T23F1.7	C27C12.7 : T23F1.7	F1		WT
sjj_C27C7.5	C27C7.5	P0		WT
sjj_C27C7.5	C27C7.5	F1		WT
sjj_C27C7.5 : sjj_T02G6.7	C27C7.5 : T02G6.7	P0		WT
sjj_C27C7.5 : sjj_T02G6.7	C27C7.5 : T02G6.7	F1		WT
sjj_C27D9.1	C27D9.1	F1	5--10	Bmd
sjj_C27D9.1	C27D9.1	P0		WT
sjj_C27D9.1 : sjj_F53C3.11	C27D9.1 : F53C3.11	P0	10--20	Emb
sjj_C27D9.1 : sjj_F53C3.11	C27D9.1 : F53C3.11	F1		WT
sjj_C27H5.2	C27H5.2	P0		WT
sjj_C27H5.2	C27H5.2	F1		WT
sjj_C27H5.2 : sjj_F46H5.7	C27H5.2 : F46H5.7	P0		WT
sjj_C27H5.2 : sjj_F46H5.7	C27H5.2 : F46H5.7	F1		WT
sjj_C27H5.5	C27H5.5	P0		WT
sjj_C27H5.5	C27H5.5	F1		WT
sjj_C27H5.6	C27H5.6	P0		WT
sjj_C27H5.6	C27H5.6	F1		WT
sjj_C27H5.6 : sjj_R02D5.6	C27H5.6 : R02D5.6	P0		WT
sjj_C27H5.6 : sjj_R02D5.6	C27H5.6 : R02D5.6	F1		WT
sjj_C27H6.2	C27H6.2	P0		Pvl
sjj_C27H6.2	C27H6.2	P0		Ste
sjj_C27H6.2	C27H6.2	F1		na
sjj_C27H6.2 : sjj_T22D1.10	C27H6.2 : T22D1.10	P0		Pvl
sjj_C27H6.2 : sjj_T22D1.10	C27H6.2 : T22D1.10	P0		Ste
sjj_C27H6.2 : sjj_T22D1.10	C27H6.2 : T22D1.10	F1		na
sjj_C28C12.5	C28C12.5	P0		WT
sjj_C28C12.5	C28C12.5	F1		WT
sjj_C28C12.5 : sjj_C28C12.7	C28C12.5 : C28C12.7	P0		WT
sjj_C28C12.5 : sjj_C28C12.7	C28C12.5 : C28C12.7	F1		WT
sjj_C28C12.7	C28C12.7	P0		WT
sjj_C28C12.7	C28C12.7	F1		WT
sjj_C28C12.8	C28C12.8	P0		Pvl
sjj_C28C12.8	C28C12.8	P0		Ste
sjj_C28C12.8	C28C12.8	P0		Adl
sjj_C28C12.8	C28C12.8	F1		na
sjj_C28H8.4	C28H8.4	P0		WT
sjj_C28H8.4	C28H8.4	F1		WT
sjj_C28H8.4 : sjj_F09B9.3	C28H8.4 : F09B9.3	P0		Lvl L3
sjj_C28H8.4 : sjj_F09B9.3	C28H8.4 : F09B9.3	P0		Gro L3
sjj_C28H8.4 : sjj_F09B9.3	C28H8.4 : F09B9.3	P0		Unc
sjj_C28H8.4 : sjj_F09B9.3	C28H8.4 : F09B9.3	F1		na
sjj_C29E6.4	C29E6.4	P0		WT
sjj_C29E6.4	C29E6.4	F1		WT
sjj_C29E6.4 : sjj_F52B11.3	C29E6.4 : F52B11.3	P0		Lvl L2
sjj_C29E6.4 : sjj_F52B11.3	C29E6.4 : F52B11.3	F1		na
sjj_C29F7.3	C29F7.3	P0		WT
sjj_C29F7.3	C29F7.3	F1		WT
sjj_C29F7.3 : sjj_F40F8.1	C29F7.3 : F40F8.1	F1		Gro sevr
sjj_C29F7.3 : sjj_F40F8.1	C29F7.3 : F40F8.1	F1	50-90	Unc mild
sjj_C29F7.3 : sjj_F40F8.1	C29F7.3 : F40F8.1	P0		WT
sjj_C29F7.6	C29F7.6	P0		WT
sjj_C29F7.6	C29F7.6	F1		WT
sjj_C29F7.6 : sjj_F23D12.5	C29F7.6 : F23D12.5	P0		WT
sjj_C29F7.6 : sjj_F23D12.5	C29F7.6 : F23D12.5	F1		WT
mv_C30D11.1	C30D11.1	P0		WT
mv_C30D11.1	C30D11.1	F1		WT
mv_C30D11.1 : sjj_F16B3.1	C30D11.1 : F16B3.1	P0		WT
mv_C30D11.1 : sjj_F16B3.1	C30D11.1 : F16B3.1	F1		WT
sjj_C30H7.2	C30H7.2	P0		WT
sjj_C30H7.2	C30H7.2	F1		WT
sjj_C31B8.11	C31B8.11	P0		WT
sjj_C31B8.11	C31B8.11	F1		WT
sjj_C31B8.11 : sjj_R11G11.9	C31B8.11 : R11G11.9	P0		WT
sjj_C31B8.11 : sjj_R11G11.9	C31B8.11 : R11G11.9	F1		WT
sjj_C31B8.9	C31B8.9	P0		WT
sjj_C31B8.9	C31B8.9	F1		WT
sjj_C31B8.9 : sjj_K06H6.5	C31B8.9 : K06H6.5	P0		WT
sjj_C31B8.9 : sjj_K06H6.5	C31B8.9 : K06H6.5	F1		WT
sjj_C31E10.1	C31E10.1	P0		WT
sjj_C31E10.1	C31E10.1	F1		WT
mv_R08C7.7 : sjj_C31E10.1	C31E10.1 : R08C7.7	P0		WT
mv_R08C7.7 : sjj_C31E10.1	C31E10.1 : R08C7.7	F1		WT
sjj_C31E10.6	C31E10.6	P0		WT
sjj_C31E10.6	C31E10.6	F1		WT
sjj_C31E10.7	C31E10.7	P0		Lbd
sjj_C31E10.7	C31E10.7	F1		Gro sevr
mv_W02D3.1 : sjj_C31E10.7	C31E10.7 : W02D3.1	P0		Gro L4
mv_W02D3.1 : sjj_C31E10.7	C31E10.7 : W02D3.1	F1		na
sjj_C31H1.1	C31H1.1	P0		WT
sjj_C31H1.1	C31H1.1	F1		WT
sjj_C31H1.1 : sjj_T25B9.6	C31H1.1 : T25B9.6	P0		WT
sjj_C31H1.1 : sjj_T25B9.6	C31H1.1 : T25B9.6	F1		WT
sjj_C31H2.2	C31H2.2	F1		Gro mod
sjj_C31H2.2	C31H2.2	F1	90--100	Dpy mild
sjj_C31H2.2	C31H2.2	F1	90--100	Unc sevr
sjj_C31H2.2	C31H2.2	P0	90--100	Dpy mild
sjj_C31H2.2 : sjj_F56D5.1	C31H2.2 : F56D5.1	F1		Gro mod
sjj_C31H2.2 : sjj_F56D5.1	C31H2.2 : F56D5.1	F1	90--100	Dpy mild
sjj_C31H2.2 : sjj_F56D5.1	C31H2.2 : F56D5.1	F1	90--100	Unc sevr
sjj_C31H2.2 : sjj_F56D5.1	C31H2.2 : F56D5.1	P0	90--100	Dpy mild
mv_C31H5.6	C31H5.6	P0		WT
mv_C31H5.6	C31H5.6	F1		WT
mv_C31H5.6 : sjj_W03D8.8	C31H5.6 : W03D8.8	P0		WT
mv_C31H5.6 : sjj_W03D8.8	C31H5.6 : W03D8.8	F1		WT
sjj_C32B5.10	C32B5.10	P0		WT
sjj_C32B5.10	C32B5.10	F1		WT
sjj_C32B5.10 : sjj_R07C3.8	C32B5.10 : R07C3.8	P0		WT
sjj_C32B5.10 : sjj_R07C3.8	C32B5.10 : R07C3.8	F1		WT
sjj_C32B5.14	C32B5.14	P0		WT
sjj_C32B5.14	C32B5.14	F1		WT
sjj_C32B5.14 : sjj_C32B5.16	C32B5.14 : C32B5.16	P0		WT
sjj_C32B5.14 : sjj_C32B5.16	C32B5.14 : C32B5.16	F1		WT
sjj_C32B5.15	C32B5.15	P0		WT
sjj_C32B5.15	C32B5.15	F1		WT
sjj_C32B5.15 : sjj_C39B5.g	C32B5.15 : C39B5.2	P0		WT
sjj_C32B5.15 : sjj_C39B5.g	C32B5.15 : C39B5.2	F1		WT
sjj_C32B5.16	C32B5.16	P0		WT
sjj_C32B5.16	C32B5.16	F1		WT
sjj_C32B5.2	C32B5.2	P0		WT
sjj_C32B5.2	C32B5.2	F1		WT
sjj_C32C4.1	C32C4.1	P0		WT
sjj_C32C4.1	C32C4.1	F1		WT
sjj_C32C4.1 : sjj_F44A2.2	C32C4.1 : F44A2.2	P0		WT
sjj_C32C4.1 : sjj_F44A2.2	C32C4.1 : F44A2.2	F1		WT
sjj_C32E8.8	C32E8.8	P0		Gro L4
sjj_C32E8.8	C32E8.8	P0		Lvl L4
sjj_C32E8.8	C32E8.8	P0	50-90	Emb
sjj_C32E8.8	C32E8.8	F1		na
sjj_C32E8.8 : sjj_F55F8.1	C32E8.8 : F55F8.1	P0		Gro L2
sjj_C32E8.8 : sjj_F55F8.1	C32E8.8 : F55F8.1	F1		na
sjj_C32H11.3	C32H11.3	P0		WT
sjj_C32H11.3	C32H11.3	F1		WT
sjj_C32H11.3 : sjj_C32H11.4	C32H11.3 : C32H11.4	P0		WT
sjj_C32H11.3 : sjj_C32H11.4	C32H11.3 : C32H11.4	F1		WT
sjj_C32H11.4	C32H11.4	P0		WT
sjj_C32H11.4	C32H11.4	F1		WT
sjj_C33C12.3	C33C12.3	P0		WT
sjj_C33C12.3	C33C12.3	F1		WT
sjj_C33C12.3 : sjj_C33C12.8	C33C12.3 : C33C12.8	P0		WT
sjj_C33C12.3 : sjj_C33C12.8	C33C12.3 : C33C12.8	F1		WT
sjj_C33C12.8	C33C12.8	P0		WT
sjj_C33C12.8	C33C12.8	F1		WT
sjj_C33D9.4	C33D9.4	P0		WT
sjj_C33D9.4	C33D9.4	F1		WT
sjj_C33D9.4 : sjj_R07B5.6	C33D9.4 : R07B5.6	P0		WT
sjj_C33D9.4 : sjj_R07B5.6	C33D9.4 : R07B5.6	F1		WT
mv_C33G3.5	C33G3.5	P0		WT
mv_C33G3.5	C33G3.5	F1		WT
mv_C33G3.5 : sjj_F18E9.7	C33G3.5 : F18E9.7	P0		WT
mv_C33G3.5 : sjj_F18E9.7	C33G3.5 : F18E9.7	F1		WT
sjj_C33H5.6	C33H5.6	P0		WT
sjj_C33H5.6	C33H5.6	F1		WT
sjj_C33H5.6 : sjj_C33H5.7	C33H5.6 : C33H5.7	P0		Ste
sjj_C33H5.6 : sjj_C33H5.7	C33H5.6 : C33H5.7	P0		Pvl
sjj_C33H5.6 : sjj_C33H5.7	C33H5.6 : C33H5.7	F1		na
sjj_C33H5.7	C33H5.7	P0		Ste
sjj_C33H5.7	C33H5.7	P0		Pvl
sjj_C33H5.7	C33H5.7	F1		na
sjj_C34B2.7	C34B2.7	F1		Gro mod
sjj_C34B2.7	C34B2.7	P0		WT
sjj_C34C12.6	C34C12.6	P0		WT
sjj_C34C12.6	C34C12.6	F1		WT
sjj_C34C12.6 : sjj_T03F7.7	C34C12.6 : T03F7.7	P0		WT
sjj_C34C12.6 : sjj_T03F7.7	C34C12.6 : T03F7.7	F1		WT
sjj_C34D4.2	C34D4.2	P0		WT
sjj_C34D4.2	C34D4.2	F1		WT
sjj_C34D4.2 : sjj_F23B12.1	C34D4.2 : F23B12.1	P0		WT
sjj_C34D4.2 : sjj_F23B12.1	C34D4.2 : F23B12.1	F1		WT
sjj_C34E10.6	C34E10.6	P0		Gro L2
sjj_C34E10.6	C34E10.6	F1		na
sjj_C34E10.6 : sjj_Y49A3A.2	C34E10.6 : Y49A3A.2	P0		Gro L2
sjj_C34E10.6 : sjj_Y49A3A.2	C34E10.6 : Y49A3A.2	F1		na
sjj_C34E10.7	C34E10.7	P0		WT
sjj_C34E10.7	C34E10.7	F1		WT
sjj_C34E10.7 : sjj_Y69A2A_7278.i	C34E10.7 : Y69A2AR.29	P0		WT
sjj_C34E10.7 : sjj_Y69A2A_7278.i	C34E10.7 : Y69A2AR.29	F1		WT
sjj_C34E11.1	C34E11.1	P0		WT
sjj_C34E11.1	C34E11.1	F1		WT
sjj_C34E11.1 : sjj_T04C10.2	C34E11.1 : T04C10.2	P0		Gro L3
sjj_C34E11.1 : sjj_T04C10.2	C34E11.1 : T04C10.2	P0		Sma
sjj_C34E11.1 : sjj_T04C10.2	C34E11.1 : T04C10.2	P0		Lvl
sjj_C34E11.1 : sjj_T04C10.2	C34E11.1 : T04C10.2	F1		na
sjj_C34F6.8	C34F6.8	P0		WT
sjj_C34F6.8	C34F6.8	F1		WT
sjj_C34F6.8 : sjj_F59B8.2	C34F6.8 : F59B8.2	P0		WT
sjj_C34F6.8 : sjj_F59B8.2	C34F6.8 : F59B8.2	F1		WT
sjj_C34G6.2	C34G6.2	P0		WT
sjj_C34G6.2	C34G6.2	F1		WT
sjj_C34G6.2 : sjj_F21C3.2	C34G6.2 : F21C3.2	P0		WT
sjj_C34G6.2 : sjj_F21C3.2	C34G6.2 : F21C3.2	F1		WT
sjj_C34H3.a	C34H3.2	F1		Gro mod
sjj_C34H3.a	C34H3.2	F1	50--90	Unc mild
sjj_C34H3.a	C34H3.2	F1	5--10	Rup
sjj_C34H3.a	C34H3.2	P0		WT
sjj_C35A11.3	C35A11.3	P0		WT
sjj_C35A11.3	C35A11.3	F1		WT
sjj_C35A11.3 : sjj_F49C5.7	C35A11.3 : F49C5.7	P0		WT
sjj_C35A11.3 : sjj_F49C5.7	C35A11.3 : F49C5.7	F1		WT
sjj_C35C5.3	C35C5.3	P0		WT
sjj_C35C5.3	C35C5.3	F1		WT
sjj_C35C5.3 : sjj_F28H7.4	C35C5.3 : F28H7.4	P0		WT
sjj_C35C5.3 : sjj_F28H7.4	C35C5.3 : F28H7.4	F1		WT
sjj_C35C5.8	C35C5.8	P0		WT
sjj_C35C5.8	C35C5.8	F1		WT
sjj_C35C5.8 : sjj_F16C3.2	C35C5.8 : F16C3.2	P0		WT
sjj_C35C5.8 : sjj_F16C3.2	C35C5.8 : F16C3.2	F1		WT
sjj_C36B1.11	C36B1.11	P0		WT
sjj_C36B1.11	C36B1.11	F1		WT
sjj_C36B1.11 : sjj_Y48G10A.f	C36B1.11 : Y48G10A.2	P0		WT
sjj_C36B1.11 : sjj_Y48G10A.f	C36B1.11 : Y48G10A.2	F1		WT
sjj_C36B7.6	C36B7.6	P0		WT
sjj_C36B7.6	C36B7.6	F1		WT
sjj_C36B7.6 : sjj_R166.2	C36B7.6 : R166.2	P0		WT
sjj_C36B7.6 : sjj_R166.2	C36B7.6 : R166.2	F1		WT
sjj_C36C9.3	C36C9.3	P0		WT
sjj_C36C9.3	C36C9.3	F1		WT
sjj_C36C9.3 : sjj_T07D3.1	C36C9.3 : T07D3.1	P0		WT
sjj_C36C9.3 : sjj_T07D3.1	C36C9.3 : T07D3.1	F1		WT
sjj_C37A2.7	C37A2.7	P0		Gro L2
sjj_C37A2.7	C37A2.7	P0		Sma
sjj_C37A2.7	C37A2.7	F1		na
sjj_C37A2.7 : sjj_Y62E10A.d	C37A2.7 : Y62E10A.1	P0		Gro L2
sjj_C37A2.7 : sjj_Y62E10A.d	C37A2.7 : Y62E10A.1	P0		Sma
sjj_C37A2.7 : sjj_Y62E10A.d	C37A2.7 : Y62E10A.1	F1		na
sjj_C37H5.2	C37H5.2	P0		WT
sjj_C37H5.2	C37H5.2	F1		WT
sjj_C37H5.2 : sjj_C37H5.3	C37H5.2 : C37H5.3	P0		WT
sjj_C37H5.2 : sjj_C37H5.3	C37H5.2 : C37H5.3	F1		WT
sjj_C37H5.3	C37H5.3	P0		WT
sjj_C37H5.3	C37H5.3	F1		WT
sjj_C37H5.9	C37H5.9	P0		WT
sjj_C37H5.9	C37H5.9	F1		WT
sjj_C37H5.9 : sjj_K09C8.3	C37H5.9 : K09C8.3	P0		WT
sjj_C37H5.9 : sjj_K09C8.3	C37H5.9 : K09C8.3	F1		WT
sjj_C38C10.1	C38C10.1	P0		WT
sjj_C38C10.1	C38C10.1	F1		WT
sjj_C38C10.1 : sjj_C49A9.7	C38C10.1 : C49A9.7	P0		WT
sjj_C38C10.1 : sjj_C49A9.7	C38C10.1 : C49A9.7	F1		WT
sjj_C38C6.3	C38C6.3	F1		Gro mod
sjj_C38C6.3	C38C6.3	F1	10--20	Lvl
sjj_C38C6.3	C38C6.3	P0		WT
sjj_C38C6.4	C38C6.4	P0		WT
sjj_C38C6.4	C38C6.4	F1		WT
sjj_C38C6.4 : sjj_C42C1.1	C38C6.4 : C42C1.1	P0		WT
sjj_C38C6.4 : sjj_C42C1.1	C38C6.4 : C42C1.1	F1		WT
sjj_C38D4.4	C38D4.4	P0		WT
sjj_C38D4.4	C38D4.4	F1		WT
sjj_C38D4.4 : sjj_F58G11.3	C38D4.4 : F58G11.3	P0		WT
sjj_C38D4.4 : sjj_F58G11.3	C38D4.4 : F58G11.3	F1		WT
sjj_C39B10.2	C39B10.2	P0		WT
sjj_C39B10.2	C39B10.2	F1		WT
mv_Y39A3B.2 : sjj_C39B10.2	C39B10.2 : Y39A3B.2	P0		WT
mv_Y39A3B.2 : sjj_C39B10.2	C39B10.2 : Y39A3B.2	F1		WT
sjj_C39B5.g	C39B5.2	P0		WT
sjj_C39B5.g	C39B5.2	F1		WT
sjj_C39D10.6	C39D10.6	P0		WT
sjj_C39D10.6	C39D10.6	F1		WT
sjj_C39D10.6 : sjj_F17H10.2	C39D10.6 : F17H10.2	P0		WT
sjj_C39D10.6 : sjj_F17H10.2	C39D10.6 : F17H10.2	F1		WT
sjj_C39E6.6	C39E6.6	P0		WT
sjj_C39E6.6	C39E6.6	F1		WT
sjj_C39E6.6 : sjj_T05A1.1	C39E6.6 : T05A1.1	P0		WT
sjj_C39E6.6 : sjj_T05A1.1	C39E6.6 : T05A1.1	F1		WT
sjj_C39E9.8	C39E9.8	P0		WT
sjj_C39E9.8	C39E9.8	F1		WT
sjj_C39E9.8 : sjj_Y105C5A.g	C39E9.8 : Y105C5A.8	P0		WT
sjj_C39E9.8 : sjj_Y105C5A.g	C39E9.8 : Y105C5A.8	F1		WT
sjj_C40H1.5	C40H1.5	P0		WT
sjj_C40H1.5	C40H1.5	F1		WT
sjj_C40H1.5 : sjj_T28B4.3	C40H1.5 : T28B4.3	P0		WT
sjj_C40H1.5 : sjj_T28B4.3	C40H1.5 : T28B4.3	F1		WT
sjj_C41C4.2	C41C4.2	P0		WT
sjj_C41C4.2	C41C4.2	F1		WT
sjj_C41G6.10	C41G6.10	P0		WT
sjj_C41G6.10	C41G6.10	F1		WT
mv_C41G6.14 : sjj_C41G6.10	C41G6.10 : C41G6.14	P0		WT
mv_C41G6.14 : sjj_C41G6.10	C41G6.10 : C41G6.14	F1		WT
mv_C41G6.14	C41G6.14	P0		WT
mv_C41G6.14	C41G6.14	F1		WT
sjj_C42C1.1	C42C1.1	P0		WT
sjj_C42C1.1	C42C1.1	F1		WT
sjj_C42C1.5	C42C1.5	P0		Ste
sjj_C42C1.5	C42C1.5	P0		Unc sevr
sjj_C42C1.5	C42C1.5	P0		Pvl
sjj_C42C1.5	C42C1.5	F1		na
sjj_C42C1.5 : sjj_Y47D9A.g	C42C1.5 : Y47D9A.1	P0		Ste
sjj_C42C1.5 : sjj_Y47D9A.g	C42C1.5 : Y47D9A.1	P0		Unc sevr
sjj_C42C1.5 : sjj_Y47D9A.g	C42C1.5 : Y47D9A.1	P0		Pvl
sjj_C42C1.5 : sjj_Y47D9A.g	C42C1.5 : Y47D9A.1	F1		na
sjj_C42C1.8	C42C1.8	P0		WT
sjj_C42C1.8	C42C1.8	F1		WT
sjj_C42D4.3	C42D4.3	P0		WT
sjj_C42D4.3	C42D4.3	F1		WT
mv_F35B3.4 : sjj_C42D4.3	C42D4.3 : F35B3.4	P0		WT
mv_F35B3.4 : sjj_C42D4.3	C42D4.3 : F35B3.4	F1		WT
sjj_C42D4.8	C42D4.8	P0		Pvl
sjj_C42D4.8	C42D4.8	P0		Ste
sjj_C42D4.8	C42D4.8	F1		na
sjj_C42D4.8 : sjj_F36A4.7	C42D4.8 : F36A4.7	P0		Gro L3
sjj_C42D4.8 : sjj_F36A4.7	C42D4.8 : F36A4.7	F1		na
sjj_C43E11.10	C43E11.10	P0		Pvl
sjj_C43E11.10	C43E11.10	P0		Ste
sjj_C43E11.10	C43E11.10	F1		na
mv_Y39A1A.12 : sjj_C43E11.10	C43E11.10 : Y39A1A.12	P0		Pvl
mv_Y39A1A.12 : sjj_C43E11.10	C43E11.10 : Y39A1A.12	P0		Ste
mv_Y39A1A.12 : sjj_C43E11.10	C43E11.10 : Y39A1A.12	F1		na
sjj_C43G2.1	C43G2.1	P0		WT
sjj_C43G2.1	C43G2.1	F1		WT
mv_Y32H12A.5 : sjj_C43G2.1	C43G2.1 : Y32H12A.5	P0		Gro L4
mv_Y32H12A.5 : sjj_C43G2.1	C43G2.1 : Y32H12A.5	P0		Pvl
mv_Y32H12A.5 : sjj_C43G2.1	C43G2.1 : Y32H12A.5	P0		Ste
mv_Y32H12A.5 : sjj_C43G2.1	C43G2.1 : Y32H12A.5	F1		na
mv_C43G2.4	C43G2.4	P0		WT
mv_C43G2.4	C43G2.4	F1		WT
mv_C43G2.4 : sjj_F32B6.9	C43G2.4 : F32B6.9	P0		WT
mv_C43G2.4 : sjj_F32B6.9	C43G2.4 : F32B6.9	F1		WT
sjj_C43H6.7	C43H6.7	P0		WT
sjj_C43H6.7	C43H6.7	F1		WT
sjj_C43H6.7 : sjj_F59C6.2	C43H6.7 : F59C6.2	P0		WT
sjj_C43H6.7 : sjj_F59C6.2	C43H6.7 : F59C6.2	F1		WT
sjj_C44B12.6	C44B12.6	P0		WT
sjj_C44B12.6	C44B12.6	F1		WT
sjj_C44B12.6 : sjj_T22H6.1	C44B12.6 : T22H6.1	P0		WT
sjj_C44B12.6 : sjj_T22H6.1	C44B12.6 : T22H6.1	F1		WT
sjj_C44B7.11	C44B7.11	P0		WT
sjj_C44B7.11	C44B7.11	F1		WT
sjj_C44B7.10	C44B7.12	P0		WT
sjj_C44B7.10	C44B7.12	F1		WT
sjj_C44C1.3	C44C1.3	P0		WT
sjj_C44C1.3	C44C1.3	F1		WT
sjj_C44C1.3 : sjj_K03E6.3	C44C1.3 : K03E6.3	P0		WT
sjj_C44C1.3 : sjj_K03E6.3	C44C1.3 : K03E6.3	F1		WT
sjj_C44C10.2	C44C10.11	P0		WT
sjj_C44C10.2	C44C10.11	F1		WT
mv_F23A7.3 : sjj_C44C10.2	C44C10.11 : F23A7.3	P0		WT
mv_F23A7.3 : sjj_C44C10.2	C44C10.11 : F23A7.3	F1		WT
sjj_C44C10.3	C44C10.3	P0		WT
sjj_C44C10.3	C44C10.3	F1		WT
sjj_C44C10.3 : sjj_T12B3.2	C44C10.3 : T12B3.2	P0		WT
sjj_C44C10.3 : sjj_T12B3.2	C44C10.3 : T12B3.2	F1		WT
sjj_C44C10.7	C44C10.7	P0		WT
sjj_C44C10.7	C44C10.7	F1		WT
sjj_C44C10.7 : sjj_K08H2.5	C44C10.7 : K08H2.5	P0		WT
sjj_C44C10.7 : sjj_K08H2.5	C44C10.7 : K08H2.5	F1		WT
sjj_C44F1.2	C44F1.2	P0		WT
sjj_C44F1.2	C44F1.2	F1		WT
sjj_C44H4.1	C44H4.1	P0		WT
sjj_C44H4.1	C44H4.1	F1		WT
sjj_C44H4.1 : sjj_ZK682.5	C44H4.1 : ZK682.5	P0		Gro L3
sjj_C44H4.1 : sjj_ZK682.5	C44H4.1 : ZK682.5	F1		na
sjj_C44H4.6	C44H4.6	P0		WT
sjj_C44H4.6	C44H4.6	F1		WT
sjj_C44H4.6 : sjj_Y18D10A.5	C44H4.6 : Y18D10A.5	P0		Pvl
sjj_C44H4.6 : sjj_Y18D10A.5	C44H4.6 : Y18D10A.5	P0		Ste
sjj_C44H4.6 : sjj_Y18D10A.5	C44H4.6 : Y18D10A.5	P0		Adl
sjj_C44H4.6 : sjj_Y18D10A.5	C44H4.6 : Y18D10A.5	P0		Unc mild
sjj_C44H4.6 : sjj_Y18D10A.5	C44H4.6 : Y18D10A.5	F1		na
sjj_C45B11.4	C45B11.4	P0		WT
sjj_C45B11.4	C45B11.4	F1		WT
sjj_C45B11.4 : sjj_T04C12.2	C45B11.4 : T04C12.2	P0		WT
sjj_C45B11.4 : sjj_T04C12.2	C45B11.4 : T04C12.2	F1		WT
sjj_C45E1.1	C45E1.1	P0		WT
sjj_C45E1.1	C45E1.1	F1		WT
sjj_C45E1.1 : sjj_T23H4.2	C45E1.1 : T23H4.2	P0		WT
sjj_C45E1.1 : sjj_T23H4.2	C45E1.1 : T23H4.2	F1		WT
sjj_C46A5.1	C46A5.1	P0		WT
sjj_C46A5.1	C46A5.1	F1		WT
sjj_C46A5.1 : sjj_F38H4.4	C46A5.1 : F38H4.4	P0		WT
sjj_C46A5.1 : sjj_F38H4.4	C46A5.1 : F38H4.4	F1		WT
sjj_C46A5.2	C46A5.2	P0		WT
sjj_C46A5.2	C46A5.2	F1		WT
sjj_C46A5.4	C46A5.4	P0		WT
sjj_C46A5.4	C46A5.4	F1		WT
sjj_C46A5.4 : sjj_T06D8.10	C46A5.4 : T06D8.10	P0		WT
sjj_C46A5.4 : sjj_T06D8.10	C46A5.4 : T06D8.10	F1		WT
sjj_C46E10.4	C46E10.4	P0		WT
sjj_C46E10.4	C46E10.4	F1		WT
sjj_C46E10.4 : sjj_C46E10.5	C46E10.4 : C46E10.5	P0		WT
sjj_C46E10.4 : sjj_C46E10.5	C46E10.4 : C46E10.5	F1		WT
sjj_C46E10.5	C46E10.5	P0		WT
sjj_C46E10.5	C46E10.5	F1		WT
sjj_C46E10.6	C46E10.6	P0		WT
sjj_C46E10.6	C46E10.6	F1		WT
sjj_C46E10.6 : sjj_F40H7.2	C46E10.6 : F40H7.2	P0		WT
sjj_C46E10.6 : sjj_F40H7.2	C46E10.6 : F40H7.2	F1		WT
sjj_C46F4.2	C46F4.2	P0		WT
sjj_C46F4.2	C46F4.2	F1		WT
sjj_C46F4.2 : sjj_F37C12.7	C46F4.2 : F37C12.7	P0		Ste
sjj_C46F4.2 : sjj_F37C12.7	C46F4.2 : F37C12.7	F1		na
sjj_C46H11.2	C46H11.2	P0		WT
sjj_C46H11.2	C46H11.2	F1		WT
sjj_C46H11.3	C46H11.3	P0		WT
sjj_C46H11.3	C46H11.3	F1		WT
sjj_C46H11.3 : sjj_M01B12.3	C46H11.3 : M01B12.3	F1		Gro mod
sjj_C46H11.3 : sjj_M01B12.3	C46H11.3 : M01B12.3	P0		WT
sjj_C47A10.1	C47A10.1	P0		WT
sjj_C47A10.1	C47A10.1	F1		WT
sjj_C47A10.1 : sjj_K08E7.9	C47A10.1 : K08E7.9	P0		WT
sjj_C47A10.1 : sjj_K08E7.9	C47A10.1 : K08E7.9	F1		WT
sjj_C47A10.8	C47A10.8	P0		WT
sjj_C47A10.8	C47A10.8	F1		WT
sjj_C47A10.8 : sjj_T07H8.1	C47A10.8 : T07H8.1	P0		WT
sjj_C47A10.8 : sjj_T07H8.1	C47A10.8 : T07H8.1	F1		WT
mv_C47E8.5	C47E8.5	P0		Gro L3
mv_C47E8.5	C47E8.5	P0		Unc mild
mv_C47E8.5	C47E8.5	F1		na
mv_C47E8.5 : sjj_T05E11.3	C47E8.5 : T05E11.3	P0		Gro L2
mv_C47E8.5 : sjj_T05E11.3	C47E8.5 : T05E11.3	P0		Unc mild
mv_C47E8.5 : sjj_T05E11.3	C47E8.5 : T05E11.3	F1		na
sjj_C47F8.1	C47F8.1	P0		WT
sjj_C47F8.1	C47F8.1	F1		WT
sjj_C47F8.1 : sjj_F35E2.8	C47F8.1 : F35E2.8	P0		WT
sjj_C47F8.1 : sjj_F35E2.8	C47F8.1 : F35E2.8	F1		WT
sjj_C48B4.10	C48B4.10	P0		WT
sjj_C48B4.10	C48B4.10	F1		WT
sjj_C48B4.10 : sjj_C48B4.7	C48B4.10 : C48B4.7	P0		WT
sjj_C48B4.10 : sjj_C48B4.7	C48B4.10 : C48B4.7	F1		WT
sjj_C48B4.2	C48B4.2	P0		WT
sjj_C48B4.2	C48B4.2	F1		WT
sjj_C48B4.2 : sjj_F26F4.3	C48B4.2 : F26F4.3	P0		WT
sjj_C48B4.2 : sjj_F26F4.3	C48B4.2 : F26F4.3	F1		WT
sjj_C48B4.7	C48B4.7	P0		WT
sjj_C48B4.7	C48B4.7	F1		WT
sjj_C48B6.2	C48B6.2	P0		Ste
sjj_C48B6.2	C48B6.2	P0		Pvl
sjj_C48B6.2	C48B6.2	F1		na
sjj_C48B6.2 : sjj_F40F8.10	C48B6.2 : F40F8.10	P0		Gro L3
sjj_C48B6.2 : sjj_F40F8.10	C48B6.2 : F40F8.10	F1		na
sjj_C48C5.1	C48C5.1	P0		WT
sjj_C48C5.1	C48C5.1	F1		WT
sjj_C48C5.1 : sjj_K10B4.4	C48C5.1 : K10B4.4	P0		WT
sjj_C48C5.1 : sjj_K10B4.4	C48C5.1 : K10B4.4	F1		WT
sjj_C48D1.1	C48D1.1	P0		WT
sjj_C48D1.1	C48D1.1	F1		WT
sjj_C48D1.1 : sjj_F58D2.1	C48D1.1 : F58D2.1	P0		WT
sjj_C48D1.1 : sjj_F58D2.1	C48D1.1 : F58D2.1	F1		WT
sjj_C49A1.6	C49A1.6	P0		WT
sjj_C49A1.6	C49A1.6	F1		WT
sjj_C49A1.6 : sjj_K04H8.1	C49A1.6 : K04H8.1	P0		WT
sjj_C49A1.6 : sjj_K04H8.1	C49A1.6 : K04H8.1	F1		WT
sjj_C49A9.2	C49A9.2	P0		WT
sjj_C49A9.2	C49A9.2	F1		WT
sjj_C49A9.2 : sjj_C49A9.3	C49A9.2 : C49A9.3	P0		WT
sjj_C49A9.2 : sjj_C49A9.3	C49A9.2 : C49A9.3	F1		WT
sjj_C49A9.3	C49A9.3	P0		WT
sjj_C49A9.3	C49A9.3	F1		WT
sjj_C49A9.7	C49A9.7	P0		WT
sjj_C49A9.7	C49A9.7	F1		WT
sjj_C49C3.1	C49C3.1	P0		WT
sjj_C49C3.1	C49C3.1	F1		WT
sjj_C49C3.1 : sjj_Y46G5.jj	C49C3.1 : Y46G5A.30	P0		WT
sjj_C49C3.1 : sjj_Y46G5.jj	C49C3.1 : Y46G5A.30	F1		WT
sjj_C49C3.2	C49C3.2	P0		WT
sjj_C49C3.2	C49C3.2	F1		WT
sjj_C49C8.1	C49C8.1	P0		WT
sjj_C49C8.1	C49C8.1	F1		WT
mv_Y71F9AL.2 : sjj_C49C8.1	C49C8.1 : Y71F9AL.2	P0		WT
mv_Y71F9AL.2 : sjj_C49C8.1	C49C8.1 : Y71F9AL.2	F1		WT
sjj_C49F5.3	C49F5.3	P0		WT
sjj_C49F5.3	C49F5.3	F1		WT
sjj_C49F5.3 : sjj_F02D10.6	C49F5.3 : F02D10.6	P0		WT
sjj_C49F5.3 : sjj_F02D10.6	C49F5.3 : F02D10.6	F1		WT
mv_C49G7.11	C49G7.11	P0		WT
mv_C49G7.11	C49G7.11	F1		WT
sjj_C50B6.2	C50B6.2	P0		WT
sjj_C50B6.2	C50B6.2	F1		WT
sjj_C50C10.2	C50C10.2	P0		WT
sjj_C50C10.2	C50C10.2	F1		WT
sjj_C50C10.2 : sjj_C50C10.4	C50C10.2 : C50C10.4	P0		WT
sjj_C50C10.2 : sjj_C50C10.4	C50C10.2 : C50C10.4	F1		WT
sjj_C50C10.4	C50C10.4	P0		WT
sjj_C50C10.4	C50C10.4	F1		WT
sjj_C50C10.6	C50C10.6	P0		WT
sjj_C50C10.6	C50C10.6	F1		WT
sjj_C50C10.6 : sjj_C50C10.7	C50C10.6 : C50C10.7	P0		WT
sjj_C50C10.6 : sjj_C50C10.7	C50C10.6 : C50C10.7	F1		WT
sjj_C50C10.7	C50C10.7	P0		WT
sjj_C50C10.7	C50C10.7	F1		WT
sjj_C50D2.1	C50D2.1	F1		Gro mod
sjj_C50D2.1	C50D2.1	P0		WT
sjj_C50D2.1 : sjj_E04F6.6	C50D2.1 : E04F6.6	F1		Gro mod
sjj_C50D2.1 : sjj_E04F6.6	C50D2.1 : E04F6.6	P0		WT
sjj_C50D2.8	C50D2.8	P0		WT
sjj_C50D2.8	C50D2.8	F1		WT
sjj_C50D2.8 : sjj_Y119D3_450.d	C50D2.8 : Y119D3B.12	P0		WT
sjj_C50D2.8 : sjj_Y119D3_450.d	C50D2.8 : Y119D3B.12	F1		WT
sjj_C50E3.7	C50E3.7	P0		WT
sjj_C50E3.7	C50E3.7	F1		WT
sjj_C50E3.7 : sjj_Y75B8A.34	C50E3.7 : Y75B8A.34	P0		WT
sjj_C50E3.7 : sjj_Y75B8A.34	C50E3.7 : Y75B8A.34	F1		WT
sjj_C50F4.2	C50F4.2	P0		WT
sjj_C50F4.2	C50F4.2	F1		WT
sjj_C50F4.2 : sjj_Y71H10A.1	C50F4.2 : Y71H10A.1	P0		WT
sjj_C50F4.2 : sjj_Y71H10A.1	C50F4.2 : Y71H10A.1	F1		WT
sjj_C50F7.10	C50F7.10	P0		WT
sjj_C50F7.10	C50F7.10	F1		WT
mv_E02H9.5 : sjj_C50F7.10	C50F7.10 : E02H9.5	P0		WT
mv_E02H9.5 : sjj_C50F7.10	C50F7.10 : E02H9.5	F1		WT
sjj_C50F7.4	C50F7.4	F1		Gro mod
sjj_C50F7.4	C50F7.4	P0		WT
sjj_C50F7.4 : sjj_F47B10.1	C50F7.4 : F47B10.1	P0		Lbd
sjj_C50F7.4 : sjj_F47B10.1	C50F7.4 : F47B10.1	F1		Gro sevr
sjj_C50H11.1	C50H11.1	P0		WT
sjj_C50H11.1	C50H11.1	F1		WT
sjj_C50H11.1 : sjj_F41C3.3	C50H11.1 : F41C3.3	P0		WT
sjj_C50H11.1 : sjj_F41C3.3	C50H11.1 : F41C3.3	F1		WT
sjj_C50H11.9	C50H11.9	P0		WT
sjj_C50H11.9	C50H11.9	F1		WT
sjj_C50H11.9 : sjj_K02H11.7	C50H11.9 : K02H11.7	P0		WT
sjj_C50H11.9 : sjj_K02H11.7	C50H11.9 : K02H11.7	F1		WT
sjj_C52B9.7	C52B9.7	P0		WT
sjj_C52B9.7	C52B9.7	F1		WT
sjj_C52B9.7 : sjj_W03G9.6	C52B9.7 : W03G9.6	P0		WT
sjj_C52B9.7 : sjj_W03G9.6	C52B9.7 : W03G9.6	F1		WT
sjj_C52E4.2	C52E4.2	P0		WT
sjj_C52E4.2	C52E4.2	F1		WT
sjj_C52E4.2 : sjj_F13G3.9	C52E4.2 : F13G3.9	P0		WT
sjj_C52E4.2 : sjj_F13G3.9	C52E4.2 : F13G3.9	F1		WT
sjj_C52E4.5	C52E4.5	P0		WT
sjj_C52E4.5	C52E4.5	F1		WT
sjj_C52E4.5 : sjj_D2030.1	C52E4.5 : D2030.1	P0		WT
sjj_C52E4.5 : sjj_D2030.1	C52E4.5 : D2030.1	F1		WT
sjj_C53B4.6	C53B4.6	P0		WT
sjj_C53B4.6	C53B4.6	F1		WT
sjj_C53B4.6 : sjj_F15B10.1	C53B4.6 : F15B10.1	P0		WT
sjj_C53B4.6 : sjj_F15B10.1	C53B4.6 : F15B10.1	F1		WT
sjj_C53B7.5	C53B7.5	P0		WT
sjj_C53B7.5	C53B7.5	F1		WT
sjj_C53B7.5 : sjj_F10D2.4	C53B7.5 : F10D2.4	P0		WT
sjj_C53B7.5 : sjj_F10D2.4	C53B7.5 : F10D2.4	F1		WT
sjj_C53C7.1	C53C7.1	P0		WT
sjj_C53C7.1	C53C7.1	F1		WT
sjj_C54A12.2	C54A12.2	P0		WT
sjj_C54A12.2	C54A12.2	F1		WT
sjj_C54A12.2 : sjj_F21C10.9	C54A12.2 : F21C10.12	P0		WT
sjj_C54A12.2 : sjj_F21C10.9	C54A12.2 : F21C10.12	F1		WT
sjj_C54D1.2	C54D1.2	P0		WT
sjj_C54D1.2	C54D1.2	F1		WT
sjj_C54D1.2 : sjj_Y38H6C.8	C54D1.2 : Y38H6C.8	P0		WT
sjj_C54D1.2 : sjj_Y38H6C.8	C54D1.2 : Y38H6C.8	F1		WT
sjj_C54D1.6	C54D1.6	F1	20--50	Lvl
sjj_C54D1.6	C54D1.6	P0		Gro L4
sjj_C54D1.6	C54D1.6	P0		Lvl L4
sjj_C54D1.6	C54D1.6	P0		Lbd
sjj_C54D1.6 : sjj_K05C4.6	C54D1.6 : K05C4.6	P0		Adl
sjj_C54D1.6 : sjj_K05C4.6	C54D1.6 : K05C4.6	P0		Ste
sjj_C54D1.6 : sjj_K05C4.6	C54D1.6 : K05C4.6	P0		Pvl
sjj_C54D1.6 : sjj_K05C4.6	C54D1.6 : K05C4.6	F1		na
sjj_C54D10.1	C54D10.1	P0		WT
sjj_C54D10.1	C54D10.1	F1		WT
sjj_C54D10.1 : sjj_C54D10.2	C54D10.1 : C54D10.2	P0		WT
sjj_C54D10.1 : sjj_C54D10.2	C54D10.1 : C54D10.2	F1		WT
sjj_C54D10.2	C54D10.2	P0		WT
sjj_C54D10.2	C54D10.2	F1		WT
sjj_C54D10.8	C54D10.8	P0		WT
sjj_C54D10.8	C54D10.8	F1		WT
sjj_C54D10.8 : sjj_W08A12.4	C54D10.8 : W08A12.4	P0		WT
sjj_C54D10.8 : sjj_W08A12.4	C54D10.8 : W08A12.4	F1		WT
sjj_C54E10.2	C54E10.2	P0		WT
sjj_C54E10.2	C54E10.2	F1		WT
sjj_C54E10.2 : sjj_W09G10.3	C54E10.2 : W09G10.3	P0		WT
sjj_C54E10.2 : sjj_W09G10.3	C54E10.2 : W09G10.3	F1		WT
sjj_C54F6.10	C54F6.10	P0		WT
sjj_C54F6.10	C54F6.10	F1		WT
sjj_C54F6.10 : sjj_T27C4.3	C54F6.10 : T27C4.3	P0		WT
sjj_C54F6.10 : sjj_T27C4.3	C54F6.10 : T27C4.3	F1		WT
sjj_C54F6.14	C54F6.14	P0		WT
sjj_C54F6.14	C54F6.14	F1		WT
sjj_C54F6.14 : sjj_D1037.3	C54F6.14 : D1037.3	P0		WT
sjj_C54F6.14 : sjj_D1037.3	C54F6.14 : D1037.3	F1		WT
sjj_C54G10.3	C54G10.3	P0		WT
sjj_C54G10.3	C54G10.3	F1		WT
sjj_C54G10.3 : sjj_T10H9.5	C54G10.3 : T10H9.5	P0		WT
sjj_C54G10.3 : sjj_T10H9.5	C54G10.3 : T10H9.5	F1		WT
sjj_C54G10.4	C54G10.4	P0		WT
sjj_C54G10.4	C54G10.4	F1		WT
sjj_C54G10.4 : sjj_F49E8.5	C54G10.4 : F49E8.5	P0		WT
sjj_C54G10.4 : sjj_F49E8.5	C54G10.4 : F49E8.5	F1		WT
sjj_C54G4.2	C54G4.2	P0		WT
sjj_C54G4.2	C54G4.2	F1		WT
sjj_C54G7.2	C54G7.2	P0		WT
sjj_C54G7.2	C54G7.2	F1		WT
sjj_C54H2.5	C54H2.5	F1		Gro sevr
sjj_C54H2.5	C54H2.5	F1	50--90	Unc mild
sjj_C54H2.5	C54H2.5	P0		WT
sjj_C54H2.5 : sjj_T02E1.7	C54H2.5 : T02E1.7	F1		Gro mod
sjj_C54H2.5 : sjj_T02E1.7	C54H2.5 : T02E1.7	F1	50--90	Unc mild
sjj_C54H2.5 : sjj_T02E1.7	C54H2.5 : T02E1.7	P0		WT
sjj_C55A1.1	C55A1.1	P0		WT
sjj_C55A1.1	C55A1.1	F1		WT
sjj_C55A1.1 : sjj_Y102A5C.28	C55A1.1 : Y102A5C.28	P0		WT
sjj_C55A1.1 : sjj_Y102A5C.28	C55A1.1 : Y102A5C.28	F1		WT
sjj_C55A1.9	C55A1.9	P0		WT
sjj_C55A1.9	C55A1.9	F1		WT
sjj_C55A1.9 : sjj_ZK380.4	C55A1.9 : ZK380.4	P0		WT
sjj_C55A1.9 : sjj_ZK380.4	C55A1.9 : ZK380.4	F1		WT
sjj_C55B6.1	C55B6.1	P0		WT
sjj_C55B6.1	C55B6.1	F1		WT
sjj_C55B6.1 : sjj_R11F4.1	C55B6.1 : R11F4.1	P0		WT
sjj_C55B6.1 : sjj_R11F4.1	C55B6.1 : R11F4.1	F1		WT
sjj_C55C3.1	C55C3.1	P0		WT
sjj_C55C3.1	C55C3.1	F1		WT
sjj_C55C3.1 : sjj_F01G10.10	C55C3.1 : F01G10.10	P0		WT
sjj_C55C3.1 : sjj_F01G10.10	C55C3.1 : F01G10.10	F1		WT
sjj_C56G2.3	C56G2.3	P0		WT
sjj_C56G2.3	C56G2.3	F1		WT
sjj_C56G2.3 : sjj_F46F11.8	C56G2.3 : F46F11.10	P0		WT
sjj_C56G2.3 : sjj_F46F11.8	C56G2.3 : F46F11.10	F1		WT
sjj_CC8.a	CC8.2	P0		WT
sjj_CC8.a	CC8.2	F1		WT
sjj_CC8.a : sjj_H18N23.a	CC8.2 : H18N23.2	P0		WT
sjj_CC8.a : sjj_H18N23.a	CC8.2 : H18N23.2	F1		WT
sjj_D1009.1	D1009.1	P0		WT
sjj_D1009.1	D1009.1	F1		WT
sjj_D1009.1 : sjj_F28D1.9	D1009.1 : F28D1.9	P0		Gro L4
sjj_D1009.1 : sjj_F28D1.9	D1009.1 : F28D1.9	P0	10-20	Emb
sjj_D1009.1 : sjj_F28D1.9	D1009.1 : F28D1.9	F1		Gro sevr
sjj_D1009.1 : sjj_F28D1.9	D1009.1 : F28D1.9	F1	90-100	Unc sevr
sjj_D1014.8	D1014.8	P0		WT
sjj_D1014.8	D1014.8	F1		WT
mv_Y74C9A.4 : sjj_D1014.8	D1014.8 : Y74C9A.4	P0		WT
mv_Y74C9A.4 : sjj_D1014.8	D1014.8 : Y74C9A.4	F1		WT
sjj_D1022.4	D1022.4	P0		WT
sjj_D1022.4	D1022.4	F1		WT
sjj_D1022.4 : sjj_D1022.5	D1022.4 : D1022.5	P0		WT
sjj_D1022.4 : sjj_D1022.5	D1022.4 : D1022.5	F1		WT
sjj_D1022.5	D1022.5	P0		WT
sjj_D1022.5	D1022.5	F1		WT
sjj_D1025.2	D1025.2	P0		WT
sjj_D1025.2	D1025.2	F1		WT
sjj_D1025.2 : sjj_F52A8.5	D1025.2 : F52A8.5	P0		WT
sjj_D1025.2 : sjj_F52A8.5	D1025.2 : F52A8.5	F1		WT
sjj_D1037.3	D1037.3	P0		WT
sjj_D1037.3	D1037.3	F1		WT
sjj_D1037.4	D1037.4	P0		WT
sjj_D1037.4	D1037.4	F1		WT
sjj_D1037.4 : sjj_T23H2.5	D1037.4 : T23H2.5	P0		Gro L3
sjj_D1037.4 : sjj_T23H2.5	D1037.4 : T23H2.5	P0		Unc sevr
sjj_D1037.4 : sjj_T23H2.5	D1037.4 : T23H2.5	F1		na
sjj_D1044.1	D1044.1	P0		WT
sjj_D1044.1	D1044.1	F1		WT
sjj_D1044.1 : sjj_H06H21.8	D1044.1 : H06H21.8	P0		WT
sjj_D1044.1 : sjj_H06H21.8	D1044.1 : H06H21.8	F1		WT
mv_D1065.1	D1065.1	P0		WT
mv_D1065.1	D1065.1	F1		WT
mv_D1065.1 : sjj_F45F2.5	D1065.1 : F45F2.5	P0		WT
mv_D1065.1 : sjj_F45F2.5	D1065.1 : F45F2.5	F1		WT
sjj_D2013.6	D2013.6	P0		Ste
sjj_D2013.6	D2013.6	F1		na
mv_D2024.7	D2024.7	P0		WT
mv_D2024.7	D2024.7	F1		WT
mv_D2024.7 : sjj_ZK1320.1	D2024.7 : ZK1320.1	P0		WT
mv_D2024.7 : sjj_ZK1320.1	D2024.7 : ZK1320.1	F1		WT
sjj_D2030.1	D2030.1	P0		WT
sjj_D2030.1	D2030.1	F1		WT
sjj_D2045.6	D2045.6	P0		Ste
sjj_D2045.6	D2045.6	P0		Adl
sjj_D2045.6	D2045.6	F1		na
sjj_D2045.6 : sjj_K08E7.7	D2045.6 : K08E7.7	P0		Ste
sjj_D2045.6 : sjj_K08E7.7	D2045.6 : K08E7.7	P0		Adl
sjj_D2045.6 : sjj_K08E7.7	D2045.6 : K08E7.7	F1		na
sjj_D2085.2	D2085.2	P0		WT
sjj_D2085.2	D2085.2	F1		WT
sjj_D2085.2 : sjj_D2085.7	D2085.2 : D2085.7	P0		WT
sjj_D2085.2 : sjj_D2085.7	D2085.2 : D2085.7	F1		WT
sjj_D2085.7	D2085.7	P0		WT
sjj_D2085.7	D2085.7	F1		WT
mv_D2089.5	D2089.5	P0		WT
mv_D2089.5	D2089.5	F1		WT
mv_D2089.5 : sjj_M05D6.7	D2089.5 : M05D6.7	P0		WT
mv_D2089.5 : sjj_M05D6.7	D2089.5 : M05D6.7	F1		WT
sjj_D2096.9	D2096.9	P0		WT
sjj_D2096.9	D2096.9	F1		WT
sjj_D2096.9 : sjj_K09C6.3	D2096.9 : K09C6.3	P0		WT
sjj_D2096.9 : sjj_K09C6.3	D2096.9 : K09C6.3	F1		WT
sjj_E02C12.2	E02C12.2	P0		WT
sjj_E02C12.2	E02C12.2	F1		WT
sjj_E02C12.2 : sjj_E02C12.3	E02C12.2 : E02C12.3	P0		WT
sjj_E02C12.2 : sjj_E02C12.3	E02C12.2 : E02C12.3	F1		WT
sjj_E02C12.3	E02C12.3	P0		WT
sjj_E02C12.3	E02C12.3	F1		WT
sjj_E02H1.1	E02H1.1	P0		Pvl
sjj_E02H1.1	E02H1.1	P0		Ste
sjj_E02H1.1	E02H1.1	F1		na
mv_T03F1.7 : sjj_E02H1.1	E02H1.1 : T03F1.7	P0		Pvl
mv_T03F1.7 : sjj_E02H1.1	E02H1.1 : T03F1.7	P0		Ste
mv_T03F1.7 : sjj_E02H1.1	E02H1.1 : T03F1.7	F1		na
sjj_E02H1.7	E02H1.7	P0		WT
sjj_E02H1.7	E02H1.7	F1		WT
sjj_E02H4.6	E02H4.6	P0		WT
sjj_E02H4.6	E02H4.6	F1		WT
sjj_E02H4.6 : sjj_K04C1.5	E02H4.6 : K04C1.5	P0		WT
sjj_E02H4.6 : sjj_K04C1.5	E02H4.6 : K04C1.5	F1		WT
mv_E02H9.5	E02H9.5	P0		WT
mv_E02H9.5	E02H9.5	F1		WT
sjj_E02H9.8	E02H9.8	P0		WT
sjj_E02H9.8	E02H9.8	F1		WT
sjj_E02H9.8 : sjj_H10E21.3	E02H9.8 : H10E21.3	P0		WT
sjj_E02H9.8 : sjj_H10E21.3	E02H9.8 : H10E21.3	F1		WT
sjj_E03H12.2	E03H12.2	P0		WT
sjj_E03H12.2	E03H12.2	F1		WT
sjj_E03H12.2 : sjj_E03H12.3	E03H12.2 : E03H12.3	P0		WT
sjj_E03H12.2 : sjj_E03H12.3	E03H12.2 : E03H12.3	F1		WT
sjj_E03H12.3	E03H12.3	P0		WT
sjj_E03H12.3	E03H12.3	F1		WT
sjj_E04F6.6	E04F6.6	P0		WT
sjj_E04F6.6	E04F6.6	F1		WT
sjj_EEED8.11	EEED8.11	P0		WT
sjj_EEED8.11	EEED8.11	F1		WT
sjj_EEED8.5	EEED8.5	P0		Gro L2
sjj_EEED8.5	EEED8.5	F1		na
sjj_EEED8.5 : sjj_K03H1.2	EEED8.5 : K03H1.2	P0		Gro L1
sjj_EEED8.5 : sjj_K03H1.2	EEED8.5 : K03H1.2	F1		na
sjj_EGAP2.3	EGAP2.3	P0	90--100	Emb
sjj_EGAP2.3	EGAP2.3	F1		na
sjj_EGAP2.3 : sjj_F07H5.9	EGAP2.3 : F07H5.9	P0	90--100	Emb
sjj_EGAP2.3 : sjj_F07H5.9	EGAP2.3 : F07H5.9	F1		na
sjj_EGAP7.1	EGAP7.1	F1	90--100	Dpy sevr
sjj_EGAP7.1	EGAP7.1	F1	90--100	Unc mild
sjj_EGAP7.1	EGAP7.1	P0		Dpy mild
sjj_EGAP7.1 : sjj_T21D12.2	EGAP7.1 : T21D12.2	P0		Dpy mild
sjj_EGAP7.1 : sjj_T21D12.2	EGAP7.1 : T21D12.2	P0		Ste
sjj_EGAP7.1 : sjj_T21D12.2	EGAP7.1 : T21D12.2	F1		na
sjj_F01D4.1	F01D4.1	P0		WT
sjj_F01D4.1	F01D4.1	F1		WT
sjj_F01D4.1 : sjj_F01D4.2	F01D4.1 : F01D4.2	P0		WT
sjj_F01D4.1 : sjj_F01D4.2	F01D4.1 : F01D4.2	F1		WT
sjj_F01D4.2	F01D4.2	P0		WT
sjj_F01D4.2	F01D4.2	F1		WT
sjj_F01D5.1	F01D5.1	P0		WT
sjj_F01D5.1	F01D5.1	F1		WT
sjj_F01D5.1 : sjj_Y39G8B.g	F01D5.1 : Y39G8B.7	P0		WT
sjj_F01D5.1 : sjj_Y39G8B.g	F01D5.1 : Y39G8B.7	F1		WT
sjj_F01D5.10	F01D5.10	P0		WT
sjj_F01D5.10	F01D5.10	F1		WT
mv_F25E5.2 : sjj_F01D5.10	F01D5.10 : F25E5.2	P0		WT
mv_F25E5.2 : sjj_F01D5.10	F01D5.10 : F25E5.2	F1		WT
sjj_F01D5.2	F01D5.2	P0		WT
sjj_F01D5.2	F01D5.2	F1		WT
sjj_F01D5.2 : sjj_F01D5.3	F01D5.2 : F01D5.3	P0		WT
sjj_F01D5.2 : sjj_F01D5.3	F01D5.2 : F01D5.3	F1		WT
sjj_F01D5.3	F01D5.3	P0		WT
sjj_F01D5.3	F01D5.3	F1		WT
sjj_F01D5.7	F01D5.7	P0		WT
sjj_F01D5.7	F01D5.7	F1		WT
sjj_F01D5.7 : sjj_F01D5.8	F01D5.7 : F01D5.8	P0		WT
sjj_F01D5.7 : sjj_F01D5.8	F01D5.7 : F01D5.8	F1		WT
sjj_F01D5.8	F01D5.8	P0		WT
sjj_F01D5.8	F01D5.8	F1		WT
sjj_F01F1.11	F01F1.11	P0		WT
sjj_F01F1.11	F01F1.11	F1		WT
sjj_F01F1.11 : sjj_Y47H9C.8	F01F1.11 : Y47H9C.8	P0		WT
sjj_F01F1.11 : sjj_Y47H9C.8	F01F1.11 : Y47H9C.8	F1		WT
sjj_F01F1.12	F01F1.12	P0	90-100	Emb
sjj_F01F1.12	F01F1.12	F1		na
sjj_F01F1.12 : sjj_T05D4.1	F01F1.12 : T05D4.1	P0		Sck
sjj_F01F1.12 : sjj_T05D4.1	F01F1.12 : T05D4.1	P0		Adl
sjj_F01F1.12 : sjj_T05D4.1	F01F1.12 : T05D4.1	P0		Lbd
sjj_F01F1.12 : sjj_T05D4.1	F01F1.12 : T05D4.1	P0	20-50	Emb
sjj_F01F1.12 : sjj_T05D4.1	F01F1.12 : T05D4.1	F1		na
sjj_F01G10.10	F01G10.10	P0		WT
sjj_F01G10.10	F01G10.10	F1		WT
sjj_F01G4.3	F01G4.3	P0		WT
sjj_F01G4.3	F01G4.3	F1		WT
sjj_F01G4.3 : sjj_W08D2.7	F01G4.3 : W08D2.7	P0		Gro L3
sjj_F01G4.3 : sjj_W08D2.7	F01G4.3 : W08D2.7	F1		na
sjj_F02A9.2	F02A9.2	P0	50-90	Emb
sjj_F02A9.2	F02A9.2	F1		Gro mod
sjj_F02A9.2 : sjj_F02A9.3	F02A9.2 : F02A9.3	F1		Gro sevr
sjj_F02A9.2 : sjj_F02A9.3	F02A9.2 : F02A9.3	P0	90-100	Emb
sjj_F02A9.3	F02A9.3	P0	20-50	Emb
sjj_F02A9.3	F02A9.3	F1		na
sjj_F02A9.6	F02A9.6	P0		Ste
sjj_F02A9.6	F02A9.6	F1		na
sjj_F02A9.6 : sjj_R107.8	F02A9.6 : R107.8	P0		Ste
sjj_F02A9.6 : sjj_R107.8	F02A9.6 : R107.8	P0		Adl
sjj_F02A9.6 : sjj_R107.8	F02A9.6 : R107.8	P0		Pvl
sjj_F02A9.6 : sjj_R107.8	F02A9.6 : R107.8	F1		na
sjj_F02C12.5	F02C12.5	P0		WT
sjj_F02C12.5	F02C12.5	F1		WT
sjj_F02C12.5 : sjj_K06G5.2	F02C12.5 : K06G5.2	P0		WT
sjj_F02C12.5 : sjj_K06G5.2	F02C12.5 : K06G5.2	F1		WT
sjj_F02D10.6	F02D10.6	P0		WT
sjj_F02D10.6	F02D10.6	F1		WT
sjj_F02E8.3	F02E8.3	P0		WT
sjj_F02E8.3	F02E8.3	F1		WT
sjj_F02E8.3 : sjj_F29G9.3	F02E8.3 : F29G9.3	P0		Gro L3
sjj_F02E8.3 : sjj_F29G9.3	F02E8.3 : F29G9.3	F1		na
sjj_F02E8.6	F02E8.6	P0		WT
sjj_F02E8.6	F02E8.6	F1		WT
sjj_F02E8.6 : sjj_F09G8.4	F02E8.6 : F09G8.4	P0		WT
sjj_F02E8.6 : sjj_F09G8.4	F02E8.6 : F09G8.4	F1		WT
sjj_F07B10.2	F07B10.2	P0		WT
sjj_F07B10.2	F07B10.2	F1		WT
sjj_F07B10.2 : sjj_F07B10.3	F07B10.2 : F07B10.3	P0		WT
sjj_F07B10.2 : sjj_F07B10.3	F07B10.2 : F07B10.3	F1		WT
sjj_F07B10.3	F07B10.3	P0		WT
sjj_F07B10.3	F07B10.3	F1		WT
sjj_F07C3.1	F07C3.1	P0		WT
sjj_F07C3.1	F07C3.1	F1		WT
sjj_F07C3.1 : sjj_F56H1.1	F07C3.1 : F56H1.1	P0		WT
sjj_F07C3.1 : sjj_F56H1.1	F07C3.1 : F56H1.1	F1		WT
sjj_F07E5.7	F07E5.7	P0		WT
sjj_F07E5.7	F07E5.7	F1		WT
sjj_F07E5.7 : sjj_R52.5	F07E5.7 : R52.5	P0		WT
sjj_F07E5.7 : sjj_R52.5	F07E5.7 : R52.5	F1		WT
sjj_F07H5.9	F07H5.9	P0		WT
sjj_F07H5.9	F07H5.9	F1		WT
mv_F08B6.3	F08B6.3	P0		WT
mv_F08B6.3	F08B6.3	F1		WT
mv_F08B6.3 : sjj_M03F4.7	F08B6.3 : M03F4.7	P0		Unc mild
mv_F08B6.3 : sjj_M03F4.7	F08B6.3 : M03F4.7	P0		Adl
mv_F08B6.3 : sjj_M03F4.7	F08B6.3 : M03F4.7	P0		Lbd
mv_F08B6.3 : sjj_M03F4.7	F08B6.3 : M03F4.7	F1		na
sjj_F08B6.4	F08B6.4	P0		WT
sjj_F08B6.4	F08B6.4	F1		WT
sjj_F08B6.4 : sjj_T25F10.6	F08B6.4 : T25F10.6	P0		Egl
sjj_F08B6.4 : sjj_T25F10.6	F08B6.4 : T25F10.6	P0		Unc mild
sjj_F08B6.4 : sjj_T25F10.6	F08B6.4 : T25F10.6	P0		Adl
sjj_F08B6.4 : sjj_T25F10.6	F08B6.4 : T25F10.6	F1		Lbd
sjj_F08B6.4 : sjj_T25F10.6	F08B6.4 : T25F10.6	F1	90-100	Unc sevr
sjj_F08B6.4 : sjj_T25F10.6	F08B6.4 : T25F10.6	F1		Gro mod
sjj_F08C6.1	F08C6.1	P0		Gro L2
sjj_F08C6.1	F08C6.1	F1		na
sjj_F08D12.2	F08D12.2	P0		WT
sjj_F08D12.2	F08D12.2	F1		WT
sjj_F08D12.2 : sjj_F08D12.3	F08D12.2 : F08D12.3	F1		Gro mild
sjj_F08D12.2 : sjj_F08D12.3	F08D12.2 : F08D12.3	P0		WT
sjj_F08D12.3	F08D12.3	F1		Gro sevr
sjj_F08D12.3	F08D12.3	P0		WT
sjj_F08D12.6	F08D12.6	P0		WT
sjj_F08D12.6	F08D12.6	F1		WT
sjj_F08D12.6 : sjj_F08D12.8	F08D12.6 : F08D12.8	P0		WT
sjj_F08D12.6 : sjj_F08D12.8	F08D12.6 : F08D12.8	F1		WT
sjj_F08D12.8	F08D12.8	P0		WT
sjj_F08D12.8	F08D12.8	F1		WT
sjj_F08F1.7	F08F1.7	P0		WT
sjj_F08F1.7	F08F1.7	F1		WT
sjj_F08F1.7 : sjj_ZK858.6	F08F1.7 : ZK858.6	P0		WT
sjj_F08F1.7 : sjj_ZK858.6	F08F1.7 : ZK858.6	F1		WT
sjj_F08F3.9	F08F3.9	P0		WT
sjj_F08F3.9	F08F3.9	F1		WT
mv_Y39E4B.2 : sjj_F08F3.9	F08F3.9 : Y39E4B.2	P0		WT
mv_Y39E4B.2 : sjj_F08F3.9	F08F3.9 : Y39E4B.2	F1		WT
sjj_F08G2.7	F08G2.7	P0		WT
sjj_F08G2.7	F08G2.7	F1		WT
sjj_F08G2.7 : sjj_F54D5.5	F08G2.7 : F54D5.5	F1	5--10	Bmd
sjj_F08G2.7 : sjj_F54D5.5	F08G2.7 : F54D5.5	P0		Lbd
sjj_F08G2.7 : sjj_F54D5.5	F08G2.7 : F54D5.5	P0		Pvl
sjj_F08G5.2	F08G5.2	P0		WT
sjj_F08G5.2	F08G5.2	F1		WT
sjj_F08H9.5	F08H9.5	P0		WT
sjj_F08H9.5	F08H9.5	F1		WT
sjj_F08H9.5 : sjj_F08H9.7	F08H9.5 : F08H9.7	P0		WT
sjj_F08H9.5 : sjj_F08H9.7	F08H9.5 : F08H9.7	F1		WT
sjj_F08H9.7	F08H9.7	P0		WT
sjj_F08H9.7	F08H9.7	F1		WT
sjj_F09B9.3	F09B9.3	P0		WT
sjj_F09B9.3	F09B9.3	F1		WT
sjj_F09C3.2	F09C3.2	P0		WT
sjj_F09C3.2	F09C3.2	F1		WT
sjj_F09C3.2 : sjj_F45E1.3	F09C3.2 : F45E1.3	P0		WT
sjj_F09C3.2 : sjj_F45E1.3	F09C3.2 : F45E1.3	F1		WT
sjj_F09C3.3	F09C3.3	P0		WT
sjj_F09C3.3	F09C3.3	F1		WT
mv_F09C3.5 : sjj_F09C3.3	F09C3.3 : F09C3.5	P0		WT
mv_F09C3.5 : sjj_F09C3.3	F09C3.3 : F09C3.5	F1		WT
sjj_F09C3.4	F09C3.4	P0		WT
sjj_F09C3.4	F09C3.4	F1		WT
sjj_F09C3.4 : sjj_T06E6.13	F09C3.4 : T06E6.13	P0		WT
sjj_F09C3.4 : sjj_T06E6.13	F09C3.4 : T06E6.13	F1		WT
mv_F09C3.5	F09C3.5	P0		WT
mv_F09C3.5	F09C3.5	F1		WT
sjj_F09C6.2	F09C6.2	P0		WT
sjj_F09C6.2	F09C6.2	F1		WT
sjj_F09C6.2 : sjj_F09C6.6	F09C6.2 : F09C6.6	P0		WT
sjj_F09C6.2 : sjj_F09C6.6	F09C6.2 : F09C6.6	F1		WT
sjj_F09C6.6	F09C6.6	P0		WT
sjj_F09C6.6	F09C6.6	F1		WT
sjj_F09C6.9	F09C6.9	P0		WT
sjj_F09C6.9	F09C6.9	F1		WT
sjj_F09C6.9 : sjj_F57A10.5	F09C6.9 : F57A10.5	P0		WT
sjj_F09C6.9 : sjj_F57A10.5	F09C6.9 : F57A10.5	F1		WT
sjj_F09E10.8	F09E10.8	P0		WT
sjj_F09E10.8	F09E10.8	F1		WT
sjj_F09E10.8 : sjj_K08E3.3	F09E10.8 : K08E3.3	P0		WT
sjj_F09E10.8 : sjj_K08E3.3	F09E10.8 : K08E3.3	F1		WT
sjj_F09E5.2	F09E5.2	P0		Lon
sjj_F09E5.2	F09E5.2	F1		na
sjj_F09E5.2 : sjj_T23F2.1	F09E5.2 : T23F2.1	P0		Lvl L3
sjj_F09E5.2 : sjj_T23F2.1	F09E5.2 : T23F2.1	F1		na
sjj_F09E8.7	F09E8.7	P0		WT
sjj_F09E8.7	F09E8.7	F1		WT
sjj_F09E8.7 : sjj_T08G11.5	F09E8.7 : T08G11.5	P0		WT
sjj_F09E8.7 : sjj_T08G11.5	F09E8.7 : T08G11.5	F1		WT
sjj_F09F3.5	F09F3.5	P0		WT
sjj_F09F3.5	F09F3.5	F1		WT
sjj_F09F3.5 : sjj_R08F11.7	F09F3.5 : R08F11.7	P0		WT
sjj_F09F3.5 : sjj_R08F11.7	F09F3.5 : R08F11.7	F1		WT
sjj_F09F7.3	F09F7.3	P0		Ste
sjj_F09F7.3	F09F7.3	P0		Pvl
sjj_F09F7.3	F09F7.3	F1		na
sjj_F09G2.6	F09G2.6	P0		WT
sjj_F09G2.6	F09G2.6	F1		WT
sjj_F09G2.6 : sjj_F10D2.6	F09G2.6 : F10D2.6	P0		WT
sjj_F09G2.6 : sjj_F10D2.6	F09G2.6 : F10D2.6	F1		WT
sjj_F09G8.4	F09G8.4	P0		WT
sjj_F09G8.4	F09G8.4	F1		WT
sjj_F10A3.9	F10A3.9	P0		WT
sjj_F10A3.9	F10A3.9	F1		WT
sjj_F10A3.9 : sjj_F41B5.8	F10A3.9 : F41B5.8	P0		WT
sjj_F10A3.9 : sjj_F41B5.8	F10A3.9 : F41B5.8	F1		WT
sjj_F10C2.3	F10C2.3	P0		WT
sjj_F10C2.3	F10C2.3	F1		WT
sjj_F10C2.3 : sjj_F15H10.7	F10C2.3 : F15H10.7	P0		WT
sjj_F10C2.3 : sjj_F15H10.7	F10C2.3 : F15H10.7	F1		WT
sjj_F10D2.4	F10D2.4	P0		WT
sjj_F10D2.4	F10D2.4	F1		WT
sjj_F10D2.6	F10D2.6	P0		WT
sjj_F10D2.6	F10D2.6	F1		WT
sjj_F10D7.2	F10D7.2	P0		WT
sjj_F10D7.2	F10D7.2	F1		WT
sjj_F10D7.2 : sjj_T25D3.4	F10D7.2 : T25D3.4	P0		WT
sjj_F10D7.2 : sjj_T25D3.4	F10D7.2 : T25D3.4	F1		WT
sjj_F10D7.3	F10D7.3	P0		WT
sjj_F10D7.3	F10D7.3	F1		WT
sjj_F10D7.3 : sjj_Y34D9A_150.d	F10D7.3 : Y34D9A.6	P0		WT
sjj_F10D7.3 : sjj_Y34D9A_150.d	F10D7.3 : Y34D9A.6	F1		WT
sjj_F10G2.2	F10G2.2	P0		WT
sjj_F10G2.2	F10G2.2	F1		WT
sjj_F10G2.2 : sjj_F58E6.4	F10G2.2 : F58E6.4	P0		WT
sjj_F10G2.2 : sjj_F58E6.4	F10G2.2 : F58E6.4	F1		WT
sjj_F10G7.1	F10G7.1	P0		Pvl
sjj_F10G7.1	F10G7.1	P0		Ste
sjj_F10G7.1	F10G7.1	P0		Adl
sjj_F10G7.1	F10G7.1	F1		na
sjj_F10G7.1 : sjj_Y61A9LA_75.a	F10G7.1 : Y61A9LA.10	P0		Pvl
sjj_F10G7.1 : sjj_Y61A9LA_75.a	F10G7.1 : Y61A9LA.10	P0		Ste
sjj_F10G7.1 : sjj_Y61A9LA_75.a	F10G7.1 : Y61A9LA.10	P0		Adl
sjj_F10G7.1 : sjj_Y61A9LA_75.a	F10G7.1 : Y61A9LA.10	F1		na
sjj_F10G7.4	F10G7.4	P0		Ste
sjj_F10G7.4	F10G7.4	P0		Pvl
sjj_F10G7.4	F10G7.4	F1		na
sjj_F10G7.4 : sjj_K08A8.3	F10G7.4 : K08A8.3	P0		Ste
sjj_F10G7.4 : sjj_K08A8.3	F10G7.4 : K08A8.3	P0		Pvl
sjj_F10G7.4 : sjj_K08A8.3	F10G7.4 : K08A8.3	F1		na
sjj_F10G8.3	F10G8.3	P0		Ste
sjj_F10G8.3	F10G8.3	F1		na
sjj_F10G8.3 : sjj_Y54G9A.6	F10G8.3 : Y54G9A.6	P0		Ste
sjj_F10G8.3 : sjj_Y54G9A.6	F10G8.3 : Y54G9A.6	F1		na
sjj_F10G8.4	F10G8.4	P0		WT
sjj_F10G8.4	F10G8.4	F1		WT
sjj_F10G8.4 : sjj_Y44A6D.4	F10G8.4 : Y44A6D.4	P0		WT
sjj_F10G8.4 : sjj_Y44A6D.4	F10G8.4 : Y44A6D.4	F1		WT
sjj_F11C1.1	F11C1.1	P0		WT
sjj_F11C1.1	F11C1.1	F1		WT
sjj_F11C1.1 : sjj_F42H10.2	F11C1.1 : F42H10.2	P0		WT
sjj_F11C1.1 : sjj_F42H10.2	F11C1.1 : F42H10.2	F1		WT
sjj_F11C1.2	F11C1.2	P0		WT
sjj_F11C1.2	F11C1.2	F1		WT
sjj_F11C1.2 : sjj_F55F8.6	F11C1.2 : F55F8.6	P0		WT
sjj_F11C1.2 : sjj_F55F8.6	F11C1.2 : F55F8.6	F1		WT
sjj_F11D5.3	F11D5.3	P0		WT
sjj_F11D5.3	F11D5.3	F1		WT
sjj_F11E6.1	F11E6.1	P0		WT
sjj_F11E6.1	F11E6.1	F1		WT
mv_Y4C6B.6 : sjj_F11E6.1	F11E6.1 : Y4C6B.6	P0		WT
mv_Y4C6B.6 : sjj_F11E6.1	F11E6.1 : Y4C6B.6	F1		WT
sjj_F11H8.2	F11H8.2	P0		WT
sjj_F11H8.2	F11H8.2	F1		WT
sjj_F11H8.2 : sjj_ZC482.1	F11H8.2 : ZC482.1	P0		WT
sjj_F11H8.2 : sjj_ZC482.1	F11H8.2 : ZC482.1	F1		WT
sjj_Y39G10B_248.c	F12B6.2	P0		WT
sjj_Y39G10B_248.c	F12B6.2	F1		WT
sjj_Y39G10B_248.c : sjj_ZK682.2	F12B6.2 : ZK682.2	P0		WT
sjj_Y39G10B_248.c : sjj_ZK682.2	F12B6.2 : ZK682.2	F1		WT
sjj_F12F6.6	F12F6.6	P0		Lvl L2
sjj_F12F6.6	F12F6.6	F1		na
sjj_F12F6.6 : sjj_ZC518.2	F12F6.6 : ZC518.2	P0		Lvl L2
sjj_F12F6.6 : sjj_ZC518.2	F12F6.6 : ZC518.2	F1		na
sjj_F13A7.10	F13A7.10	P0		WT
sjj_F13A7.10	F13A7.10	F1		WT
sjj_F13A7.11	F13A7.11	P0		WT
sjj_F13A7.11	F13A7.11	F1		WT
sjj_F13A7.3	F13A7.3	P0		WT
sjj_F13A7.3	F13A7.3	F1		WT
sjj_F13A7.3 : sjj_F57G8.9	F13A7.3 : F57G8.8	P0		WT
sjj_F13A7.3 : sjj_F57G8.9	F13A7.3 : F57G8.8	F1		WT
sjj_F13B9.8	F13B9.8	P0		WT
sjj_F13B9.8	F13B9.8	F1		WT
sjj_F13B9.8 : sjj_F41G3.4	F13B9.8 : F41G3.4	P0		WT
sjj_F13B9.8 : sjj_F41G3.4	F13B9.8 : F41G3.4	F1		WT
sjj_F13D12.5	F13D12.5	P0		WT
sjj_F13D12.5	F13D12.5	F1		WT
sjj_F13D12.5 : sjj_T21B10.4	F13D12.5 : T21B10.4	P0		WT
sjj_F13D12.5 : sjj_T21B10.4	F13D12.5 : T21B10.4	F1		WT
sjj_F13D12.7	F13D12.7	F1		Gro sevr
sjj_F13D12.7	F13D12.7	P0		Lbd
mv_F52A8.2 : sjj_F13D12.7	F13D12.7 : F52A8.2	F1		Gro mod
mv_F52A8.2 : sjj_F13D12.7	F13D12.7 : F52A8.2	P0		Lbd
sjj_F13G3.7	F13G3.7	P0		WT
sjj_F13G3.7	F13G3.7	F1		WT
sjj_F13G3.7 : sjj_Y43C5B.3	F13G3.7 : Y43C5B.3	P0		WT
sjj_F13G3.7 : sjj_Y43C5B.3	F13G3.7 : Y43C5B.3	F1		WT
sjj_F13G3.9	F13G3.9	P0		WT
sjj_F13G3.9	F13G3.9	F1		WT
sjj_F14B4.2	F14B4.2	P0		WT
sjj_F14B4.2	F14B4.2	F1		WT
sjj_F14B4.2 : sjj_H25P06.1	F14B4.2 : H25P06.1	P0		WT
sjj_F14B4.2 : sjj_H25P06.1	F14B4.2 : H25P06.1	F1		WT
mv_F14B6.1	F14B6.1	P0		WT
mv_F14B6.1	F14B6.1	F1		WT
mv_F14B6.1 : sjj_F14B6.3	F14B6.1 : F14B6.3	P0		WT
mv_F14B6.1 : sjj_F14B6.3	F14B6.1 : F14B6.3	F1		WT
sjj_F14B6.3	F14B6.3	P0		WT
sjj_F14B6.3	F14B6.3	F1		WT
sjj_F14B8.5	F14B8.7	P0		WT
sjj_F14B8.5	F14B8.7	F1		WT
mv_F14F4.1	F14F4.1	P0		WT
mv_F14F4.1	F14F4.1	F1		WT
mv_F14F4.1 : sjj_T07D10.2	F14F4.1 : T07D10.2	P0		WT
mv_F14F4.1 : sjj_T07D10.2	F14F4.1 : T07D10.2	F1		WT
sjj_F14H3.11	F14H3.11	P0		WT
sjj_F14H3.11	F14H3.11	F1		WT
sjj_F14H3.11 : sjj_F35E8.12	F14H3.11 : F35E8.12	P0		WT
sjj_F14H3.11 : sjj_F35E8.12	F14H3.11 : F35E8.12	F1		WT
sjj_F15A2.6	F15A2.6	P0		WT
sjj_F15A2.6	F15A2.6	F1		WT
sjj_AH10.5a : sjj_F15A2.6	F15A2.6 : H39E23.1	P0		WT
sjj_AH10.5a : sjj_F15A2.6	F15A2.6 : H39E23.1	F1		WT
sjj_F15B10.1	F15B10.1	P0		WT
sjj_F15B10.1	F15B10.1	F1		WT
sjj_F15B9.3	F15B9.9	P0		WT
sjj_F15B9.3	F15B9.9	F1		WT
sjj_F15B9.3 : sjj_W09G12.4	F15B9.9 : W09G12.4	P0		WT
sjj_F15B9.3 : sjj_W09G12.4	F15B9.9 : W09G12.4	F1		WT
sjj_F15D3.4	F15D3.4	P0		WT
sjj_F15D3.4	F15D3.4	F1		WT
sjj_F15D3.4 : sjj_F44G3.7	F15D3.4 : F44G3.7	P0		WT
sjj_F15D3.4 : sjj_F44G3.7	F15D3.4 : F44G3.7	F1		WT
sjj_F15D3.6	F15D3.6	F1		Gro mod
sjj_F15D3.6	F15D3.6	P0		WT
sjj_F15H10.7	F15H10.7	P0		WT
sjj_F15H10.7	F15H10.7	F1		WT
sjj_F15H9.1	F15H9.1	P0		WT
sjj_F15H9.1	F15H9.1	F1		WT
sjj_F15H9.1 : sjj_F35E2.5	F15H9.1 : F35E2.5	P0		WT
sjj_F15H9.1 : sjj_F35E2.5	F15H9.1 : F35E2.5	F1		WT
sjj_F16B3.1	F16B3.1	P0		WT
sjj_F16B3.1	F16B3.1	F1		WT
mv_F16B4.1	F16B4.1	P0		WT
mv_F16B4.1	F16B4.1	F1		WT
mv_F16B4.1 : mv_F16B4.12	F16B4.1 : F16B4.12	P0		WT
mv_F16B4.1 : mv_F16B4.12	F16B4.1 : F16B4.12	F1		WT
mv_F16B4.12	F16B4.12	P0		WT
mv_F16B4.12	F16B4.12	F1		WT
mv_F16B4.2	F16B4.2	P0		WT
mv_F16B4.2	F16B4.2	F1		WT
mv_F16B4.2 : sjj_Y17G7B.8	F16B4.2 : Y17G7B.8	P0		WT
mv_F16B4.2 : sjj_Y17G7B.8	F16B4.2 : Y17G7B.8	F1		WT
sjj_F16B4.5	F16B4.5	P0		WT
sjj_F16B4.5	F16B4.5	F1		WT
sjj_F16B4.5 : sjj_F16B4.7	F16B4.5 : F16B4.7	P0		WT
sjj_F16B4.5 : sjj_F16B4.7	F16B4.5 : F16B4.7	F1		WT
sjj_F16B4.7	F16B4.7	P0		WT
sjj_F16B4.7	F16B4.7	F1		WT
sjj_F16C3.1	F16C3.1	P0		WT
sjj_F16C3.1	F16C3.1	F1		WT
sjj_F16C3.2	F16C3.2	P0		WT
sjj_F16C3.2	F16C3.2	F1		WT
sjj_F16F9.5	F16F9.5	P0		WT
sjj_F16F9.5	F16F9.5	F1		WT
sjj_F16F9.5 : sjj_T01C8.7	F16F9.5 : T01C8.7	P0		WT
sjj_F16F9.5 : sjj_T01C8.7	F16F9.5 : T01C8.7	F1		WT
sjj_F17A2.12	F17A2.12	P0		WT
sjj_F17A2.12	F17A2.12	F1		WT
sjj_F17A2.12 : sjj_F17A2.6	F17A2.12 : F17A2.6	P0		WT
sjj_F17A2.12 : sjj_F17A2.6	F17A2.12 : F17A2.6	F1		WT
sjj_F17A2.5	F17A2.5	P0		WT
sjj_F17A2.5	F17A2.5	F1		WT
sjj_F17A2.5 : sjj_F31E3.1	F17A2.5 : F31E3.1	F1	50--90	Unc sevr
sjj_F17A2.5 : sjj_F31E3.1	F17A2.5 : F31E3.1	P0		Adl
sjj_F17A2.5 : sjj_F31E3.1	F17A2.5 : F31E3.1	P0		Lbd
sjj_F17A2.5 : sjj_F31E3.1	F17A2.5 : F31E3.1	P0		Pvl
sjj_F17A2.6	F17A2.6	P0		WT
sjj_F17A2.6	F17A2.6	F1		WT
sjj_F17B5.1	F17B5.1	P0		WT
sjj_F17B5.1	F17B5.1	F1		WT
sjj_F17B5.1 : sjj_T05F1.11	F17B5.1 : T05F1.11	P0		WT
sjj_F17B5.1 : sjj_T05F1.11	F17B5.1 : T05F1.11	F1		WT
sjj_F17C11.2	F17C11.2	P0		WT
sjj_F17C11.2	F17C11.2	F1		WT
sjj_F17E9.7	F17E9.7	P0		WT
sjj_F17E9.7	F17E9.7	F1		WT
sjj_F17E9.7 : sjj_F17E9.8	F17E9.7 : F17E9.8	P0		WT
sjj_F17E9.7 : sjj_F17E9.8	F17E9.7 : F17E9.8	F1		WT
sjj_F17E9.8	F17E9.8	P0		WT
sjj_F17E9.8	F17E9.8	F1		WT
sjj_F17H10.2	F17H10.2	P0		WT
sjj_F17H10.2	F17H10.2	F1		WT
sjj_T06D4.5	F18A12.5	P0		WT
sjj_T06D4.5	F18A12.5	F1		WT
sjj_T06D4.4 : sjj_T06D4.5	F18A12.5 : T06D4.4	P0		WT
sjj_T06D4.4 : sjj_T06D4.5	F18A12.5 : T06D4.4	F1		WT
sjj_F18A12.8	F18A12.8	P0		WT
sjj_F18A12.8	F18A12.8	F1		WT
sjj_F18A12.8 : sjj_ZK20.6	F18A12.8 : ZK20.6	P0		WT
sjj_F18A12.8 : sjj_ZK20.6	F18A12.8 : ZK20.6	F1		WT
sjj_F18C12.1	F18C12.1	P0		WT
sjj_F18C12.1	F18C12.1	F1		WT
sjj_F18C12.1 : sjj_T21E12.4	F18C12.1 : T21E12.4	P0		Lvl L4
sjj_F18C12.1 : sjj_T21E12.4	F18C12.1 : T21E12.4	F1		na
sjj_F18E9.7	F18E9.7	P0		WT
sjj_F18E9.7	F18E9.7	F1		WT
sjj_F18H3.3	F18H3.3	P0		Gro L3
sjj_F18H3.3	F18H3.3	F1		na
sjj_F18H3.3 : sjj_Y106G6H.2	F18H3.3 : Y106G6H.2	P0		Gro L1
sjj_F18H3.3 : sjj_Y106G6H.2	F18H3.3 : Y106G6H.2	F1		na
sjj_F19B10.10	F19B10.10	P0		WT
sjj_F19B10.10	F19B10.10	F1		WT
sjj_F19B10.10 : sjj_K12B6.8	F19B10.10 : K12B6.8	P0		WT
sjj_F19B10.10 : sjj_K12B6.8	F19B10.10 : K12B6.8	F1		WT
sjj_F19B10.7	F19B10.7	P0		WT
sjj_F19B10.7	F19B10.7	F1		WT
sjj_F19B10.7 : sjj_F19B10.8	F19B10.7 : F19B10.8	P0		WT
sjj_F19B10.7 : sjj_F19B10.8	F19B10.7 : F19B10.8	F1		WT
sjj_F19B10.8	F19B10.8	P0		WT
sjj_F19B10.8	F19B10.8	F1		WT
sjj_F19F10.1	F19F10.1	P0		WT
sjj_F19F10.1	F19F10.1	F1		WT
sjj_F19F10.1 : sjj_F19F10.5	F19F10.1 : F19F10.5	P0		WT
sjj_F19F10.1 : sjj_F19F10.5	F19F10.1 : F19F10.5	F1		WT
sjj_F19F10.5	F19F10.5	P0		WT
sjj_F19F10.5	F19F10.5	F1		WT
mv_F19H6.4	F19H6.4	P0		WT
mv_F19H6.4	F19H6.4	F1		WT
mv_F19H6.4 : sjj_F42F12.3	F19H6.4 : F42F12.3	P0		WT
mv_F19H6.4 : sjj_F42F12.3	F19H6.4 : F42F12.3	F1		WT
sjj_F20C5.4	F20C5.4	P0		WT
sjj_F20C5.4	F20C5.4	F1		WT
sjj_F20C5.4 : sjj_R08C7.2	F20C5.4 : R08C7.2	F1		Gro mod
sjj_F20C5.4 : sjj_R08C7.2	F20C5.4 : R08C7.2	P0		WT
sjj_F20D1.9	F20D1.9	P0		WT
sjj_F20D1.9	F20D1.9	F1		WT
sjj_F20D1.9 : sjj_F55G1.5	F20D1.9 : F55G1.5	P0		WT
sjj_F20D1.9 : sjj_F55G1.5	F20D1.9 : F55G1.5	F1		WT
sjj_F20D6.8	F20D6.8	P0		WT
sjj_F20D6.8	F20D6.8	F1		WT
sjj_F20D6.8 : sjj_W04C9.5	F20D6.8 : W04C9.5	P0		WT
sjj_F20D6.8 : sjj_W04C9.5	F20D6.8 : W04C9.5	F1		WT
sjj_F20G2.1	F20G2.1	P0		WT
sjj_F20G2.1	F20G2.1	F1		WT
sjj_F20G2.1 : sjj_F20G2.2	F20G2.1 : F20G2.2	P0		WT
sjj_F20G2.1 : sjj_F20G2.2	F20G2.1 : F20G2.2	F1		WT
sjj_F20G2.2	F20G2.2	P0		WT
sjj_F20G2.2	F20G2.2	F1		WT
sjj_F20G2.3	F20G2.3	P0		WT
sjj_F20G2.3	F20G2.3	F1		WT
mv_R03A10.5 : sjj_F20G2.3	F20G2.3 : R03A10.5	P0		WT
mv_R03A10.5 : sjj_F20G2.3	F20G2.3 : R03A10.5	F1		WT
sjj_F20G2.5	F20G2.5	P0		WT
sjj_F20G2.5	F20G2.5	F1		WT
sjj_F20G2.5 : sjj_F53C11.1	F20G2.5 : F53C11.1	P0		WT
sjj_F20G2.5 : sjj_F53C11.1	F20G2.5 : F53C11.1	F1		WT
sjj_F21A10.2	F21A10.2	P0		WT
sjj_F21A10.2	F21A10.2	F1		WT
sjj_F21A10.2 : sjj_F59B10.1	F21A10.2 : F59B10.1	P0		Gro L2
sjj_F21A10.2 : sjj_F59B10.1	F21A10.2 : F59B10.1	F1		na
sjj_F21C10.9	F21C10.12	P0		WT
sjj_F21C10.9	F21C10.12	F1		WT
sjj_F21C10.8	F21C10.8	P0		WT
sjj_F21C10.8	F21C10.8	F1		WT
sjj_F21C10.8 : sjj_ZC21.3	F21C10.8 : ZC21.3	P0		WT
sjj_F21C10.8 : sjj_ZC21.3	F21C10.8 : ZC21.3	F1		WT
sjj_F21C3.2	F21C3.2	P0		WT
sjj_F21C3.2	F21C3.2	F1		WT
sjj_F21D9.2	F21D9.2	P0		WT
sjj_F21D9.2	F21D9.2	F1		WT
sjj_F21D9.2 : sjj_W07E6.5	F21D9.2 : W07E6.5	P0		WT
sjj_F21D9.2 : sjj_W07E6.5	F21D9.2 : W07E6.5	F1		WT
sjj_F21D9.4	F21D9.4	P0		WT
sjj_F21D9.4	F21D9.4	F1		WT
sjj_F21D9.4 : sjj_ZK228.3	F21D9.4 : ZK228.3	P0		WT
sjj_F21D9.4 : sjj_ZK228.3	F21D9.4 : ZK228.3	F1		WT
sjj_F21F3.2	F21F3.2	P0		WT
sjj_F21F3.2	F21F3.2	F1		WT
sjj_F21F3.2 : sjj_Y106G6D.4	F21F3.2 : Y106G6D.4	P0		WT
sjj_F21F3.2 : sjj_Y106G6D.4	F21F3.2 : Y106G6D.4	F1		WT
sjj_F21F3.3	F21F3.3	P0		WT
sjj_F21F3.3	F21F3.3	F1		WT
sjj_F21F3.3 : sjj_M01E11.1	F21F3.3 : M01E11.1	P0		WT
sjj_F21F3.3 : sjj_M01E11.1	F21F3.3 : M01E11.1	F1		WT
sjj_F21F3.5	F21F3.5	P0		WT
sjj_F21F3.5	F21F3.5	F1		WT
[truncated: 3,035 more rows]
